# Supplementary material for: Mitochondrial genome of Bactrocera fruit flies (Tephritidae: Dacini): Features, Structure, and significance for Diagnosis
Source: Research Square preprint supplement (doi:10.21203/rs.3.rs-6459370/v1), 2025-05-16
Supplement: Supplementary file 1 [file ee90f5be34d105699615a656.docx]

Supplementary material

Mitochondrial genome of *Bactrocera* fruit flies (Tephritidae: Dacini): Features, Structure and significance for Diagnosis

Castellanos, Nathaly Lara1, Gunawardana, Disna N.1, McCarthy, Bede2, Sathish, Puthigae1, George, Sherly4, Li, Dongmei1*

*1Ministry for Primary Industries, Plant Health & Environmental Laboratory, 231 Morrin Road, Auckland, New Zealand.*

*2Ministry for Primary Industries, Plant Health & Environmental Laboratory, 14 Sir William Pickering Drive, Christchurch, New Zealand.*

*Corresponding author

# SUPPLEMENTARY NOTES

## Supplementary material and methods

### Sample selection and preparation for mitochondrial genome sequencing

A total of 411 adult fruit fly specimens were identified using available taxonomic keys [1, 2]. Dorsal and lateral photographs of representative specimens from each species were taken with a Canon EOS R5 camera, and Helicon Focus stacking software (Helicon Soft. Ltd.) was used to merge images from different focal plains. Then, a leg was used for DNA extraction for [3] the mitochondrial Cytochrome Oxidase I (*COI*) gene sequencing. The DNA extracted was used for PCR amplification with primers, LCO1490 and HCO2198 [3], also BP-F1 BP-R1 for *B. passiflorae* specimens [4] and FFCOI-F and HCO2198 for *B. tryoni* [5] due to the detection of Nuclear mitochondrial pseudo-COI (so-called NUMT) in the two species. For all the PCR reactions, 20 µL reactions were performed, consisting of 1× GoTaq master mix (Promega, Madison, WI), 250 nM of each primer, 0.5 µg/µL Bovine Serum Albumin (BSA, Sigma-Aldrich Co.), 1.5 mM additional MgCl2 (Promega, Madison, WI), and 2 µL of DNA extract. The PCR cycle conditions were an initial denaturation step at 94°C for 5 min followed by 40 cycles of denaturation step at 94°C for 15 sec, annealing step at 50°C for 30 sec and an elongation step at 72°C for 45 sec, which was followed by a final elongation step at 72°C for 7 min. The PCR products were electrophoresed on 1.2% agarose (in 1x TAE buffer), gel stained with SYBR® safe (Life Technologies™, CA, USA), and visualised using a Gel Doc Software system (BioRad, Hercules, CA, USA). Each PCR product was diluted 2–4x with water depending on the band density and the dilutions were sequenced bi-directionally using the amplification primers at either EcoGene (Auckland, New Zealand) or Macrogen (Soul, South Korea). DNA sequences were analysed using Geneious Prime 2021.1.1 (https://www.geneious.com/). The DNA sequences were submitted to BOLD database under the project of “Ops Research Project Fruit Flies Pacific Islands” (ORPFF). After the sequence analysis, different haplotype from each species were selected for mitochondrial genome sequencing, as a result, 82 samples of 19 species, representing three genera were used for NovaSeq.

### Samples real-time PCR assay development

A total of 104 fruit fly specimens from various geographical origins (Supplementary table S7 were used for the development and validation of the newly *B. curvipennis* duplex real-time PCR assay. In total, 15 specimens from the target species, 78 closely related *Bactrocera sp.* from the Pacific Islands, and other ten non-target Tephritidae flies from around the world were used. Most specimens were obtained from insect collections from Australia, Cook Islands, Fiji, French Polynesia, New Caledonia, Tonga and Vanuatu. Other specimens were intercepted at New Zealand borders from various countries. All adult specimens were identified using available taxonomic keys before conducting molecular analyses. All the adult specimens were identified morphologically using taxonomic keys by the entomologists in PHEL, and some specimens were confirmed by the specialist Dr Dick Drew. All the samples tested was also DNA barcoded and identified using BOLD identifier.

### Repeatability and reproducibility

Repeatability (intra-run variation) and reproducibility (inter-run variation) each singleplex assay were reported as Cq standard deviation and per cent coefficient of variance (%CV) within and between assays. To estimate the repeatability (intra-run), eight concentrations (0.1 copy/µL to 1 × 107 copies/µL) of “all-in-one” synthetic control were tested using five replicates. Also, the assays were run independently at different time in two different machines under the same conditions to calculate %CV as a measure of reproducibility (inter-run). Measurement of uncertainty (MU) was calculated using the standard deviation of the repeatability and reproducibility using the formula:

## Supplementary results

### Codon Usage

Codon usage in the fruit flies from the Pacific Islands followed the pattern of other Tephritids (Supplementary table 3) [6]. All PCGs started with standard initiation codons, except for the COI that stared with TGC a common feature in Diptera [7]. Each PCG is terminated with TAA or TAG as stop codons, or with a single T residue as an incomplete stop codon. These incomplete termination codons are common in animal mitochondrial DNA and is presumed to be filled by polyadenylation during the maturation of mRNA [8].

The extent of codon usage bias in the mitogenome was determined and compared based on the effective number of codons (Nc) and the codon adaptation index (CAI) values of 79 fruit fly’s species. The values obtained for Nc ranged from 25.77 to 59.15, with an average of 36.84 (Supplementary figure S 3A), while CAI values varied from 0.076 to 0.1667 (Supplementary figure S 3B). Using the conventional Nc lower than 35 and CAI higher than 0.3 to delineate strong codon bias, these averages indicated a generally weak codon usage bias in *Bactrocera* mitogenomes.

### Sensitivity of B. curvipennis assay

Serial dilutions of genomic DNA from two different COI sequence variants of *B. curvipennis* (BCNC5 and BCNC7), were prepared in water to test whether the sensitivity is affected by the presence of mismatches and the inhibitors in the extractions. The efficiency of the real-time PCR was high and no apparently affected by the PCR inhibitors, with the limit of detection (LOD) for both *B. curvipennis* specimens of 10 fg/µL. There were small differences between the average Cq, the specimen BCNC5 with no mismatches the LOD was 35.84 compared to the Cq 37.67 observed in BCNC7 (Supplementary figure S 9A-C respectively). Additionally, the sensitivity and the efficiency of the multiplex assay was comparable with the singlexplex assays (Supplementary figure S 9). The LOD of the multiplex assay remains in 10 copies/µL of synthetic DNA template, with an average Cq of 34.22 in duplex compared with 33.71 in singleplex. The amplification efficiency was 95.0 % in duplex (Supplementary figure S 9C), comparable with 101.1 % efficiency observed in singleplex (Figure 5).

### Repeatability and reproducibility

There are various factors that can introduce bias and contribute to the measurement of uncertainty in a molecular test. The value for the estimated measure of uncertainty for *Bactrocera curvipennis* was calculated to be 0.56 (Supplementary table S8), which means when *B. curvipennis* singleplex real-time PCR is performed, a confident Cqvalue of 25.00 should be read as 25.00 ± 0.36. If Cqvalues between 35.54 and 36.36 are obtained, the results should be interpreted as questionable and need to be further determined since the cut-off Cq is set to be 36.00.

## References

1. Leblanc L. The dacine fruit flies (Diptera: Tephritidae: Dacini) of Oceania. Insecta Mundi. 2022.

2. Drew RAI, Drew RAI. The tropical fruit flies (Diptera: Tephritidae: Dacinae) of the Australasian region and Oceanic regions. Memoirs of the Queensland Museum. 1989;26:1--521.

3. Ratnasingham S, Hebert PDN. bold: The Barcode of Life Data System (http://www.barcodinglife.org). MolEco Notes. 2007;7:355–64.

4. Folmer O, Black M, Hoeh W, Lutz R, Vrijenhoek R. DNA primers for amplification of mitochondrial cytochrome c oxidase subunit I from diverse metazoan invertebrates. Molecular Marine Bio Biotech. 1994;3:294–9.

5. Li D, McCarthy B, Gunawardana DN, Waite DW, Anderson D, George S. Molecular identification of *Bactrocera passiflorae* (Diptera: Tephritidae): Challenge and solution for DNA barcoding. J App Ent. 2020;144:877–84.

6. Blacket MJ, Semeraro L, Malipatil MB. Barcoding Queensland Fruit Flies (*Bactrocera tryoni*): impediments and improvements. Mol Eco Res. 2012;12:428–36.

7. Zhang Y, Feng S, Zeng Y, Ning H, Liu L, Zhao Z, et al. The first complete mitochondrial genome of *Bactrocera tsuneonis* (Miyake) (Diptera: Tephritidae) by next-generation sequencing and its phylogenetic implications. Int J Bio Macromol. 2018;118:1229–37.

8. Cameron SL. Insect Mitochondrial Genomics: Implications for Evolution and Phylogeny. Annual Review of Entomology. 2014;59 Volume 59, 2014:95–117.

9. Ojala D, Montoya J, Attardi G. tRNA punctuation model of RNA processing in human mitochondria. Nature. 1981;290:470–4.

# SUPPLEMENTARY TABLES

## Samples for mitochondrial genome sequencing

**Supplementary table S1** Sampling coverage and the list of samples obtained for mitogenome sequencing of fruit flies from the Pacific Islands*.*

| **Species** | **Individuals** | **Sample ID** | **Country of origin** |
| --- | --- | --- | --- |
| *Bactrocera anomala* | 1 | BAV4 | Efate, Shefa Province, Vanuatu |
| *B. caledoniensis* | 1 | BNCa1 | Pocquereux, La Foa, New Caledonia |
| *B. curvipennis* | 5 | BCNC1, 5, 7, 10, 13 | Ouano, La Foa, New Caledonia |
| *B. curvipennis* | 2 | BQ112, T15_06386_2 | New Caledonia |
| *B. distincta* | 1 | 1B FF | Tailevu, Fiji |
| *B. distincta* | 3 | BDF1, 3, 4 | Nadi, Fiji |
| *B. distincta* | 1 | BDS1 | Samoa |
| *B. facialis* | 2 | BFT10-11 | Alaki, Tonga |
| *B. facialis* | 2 | BFT12,14 | Fo’ui, Tonga |
| *B. facialis* | 4 | BFT51, 69, 85, 87 | Longolongo Nuku'alofa, Tonga |
| *B. facialis* | 3 | BFT128, 36, 51 | Manuka, Tonga |
| *B. kirki* | 5 | BKS1 | Samoa |
| *B. melanotus* | 3 | BMC4,10,13 | Cook Islands |
| *B. melanotus* | 2 | BMC24, 26 | Rarotonga, Cook Islands |
| *B. minuta* | 1 | BMV2 | Efate, Shefa Province, Vanuatu |
| *B. neohumeralis* | 2 | BQ115,1188 | Cairns, Queensland, Australia |
| *B. neohumeralis* | 1 | BQ123 | Dalrymple Islet, Torres strait, Queensland, Australia |
| *B. neohumeralis* | 1 | BQ127 | Old Mapoom, Queensland, Australia |
| *B. passiflorae* | 2 | 3A-FF,3B-FF | Nausori, Fiji |
| *B. passiflorae* | 3 | SE_02801A-C | Fiji |
| *B. passiflorae* | 1 | BPF3 | Suva-Lami, Fiji |
| *B. passiflorae* | 1 | BPF4 | Nadi, Fiji |
| *B. passiflorae* | 1 | BPF15 | Fiji |
| *B. obscura* | 1 | BOS2 | Samoa |
| *B. psidii* | 1 | BPNC1 | Col d'Amieu, Sarraméa, New Caledonia |
| *B. psidii* | 2 | BPNC10, 16 | Sarraméa, New Caledonia |
| *B. trilineola* | 3 | BTV2, 8, 18 | Efate, Shefa Province, Vanuatu |
| *B. tryoni* | 1 | Bt 10 | Coen, Queensland, Australia |
| *B. tryoni* | 1 | Bt 15 | Mourilyan Harbour, Queensland, Australia |
| *B. tryoni* | 1 | Bt 16 | Brisbane, Queensland, Australia |
| *B. tryoni* | 2 | Bt 1,16 | Brisbane, Queensland, Australia |
| *B. tryoni* | 1 | Bt 2 | Gladstone, Queensland, Australia |
| *B. tryoni* | 1 | Bt 4 | Bundaberg, Queensland, Australia |
| *B. tryoni* | 1 | Bt 8 | Cairns, Queensland, Australia |
| *B. tryoni* | 1 | BTFP1 | French Polynesia |
| *B. tryoni* | 5 | T15_06386/15, 16, 18, 19, 28 | New Caledonia |
| *B. tryoni* | 3 | T15_01099#102,112, T15_00905#57 | New Zealand (2015 Response samples, it has been eradicated) |
| *B. umbrosa* | 1 | BUNC8 | Pocquereux, La Foa, New Caledonia |
| *B. umbrosa* | 1 | BUV1 | Shefa Province, Vanuatu |
| *B. xanthodes* | 2 | 2A-FF, 2B-FF | Suva-Lami, Fiji |
| *B. xanthodes* | 1 | BXC1 | Cook Islands |
| *B. xanthodes* | 1 | BXF2 | Nadi, Fiji |
| *B. xanthodes* | 1 | BXFP1 | French Polynesia |
| *Dacus aneuvittatus* | 1 | BXS1 | New Caledonia |
| *Dirioxa pornia* | 1 | DANC1 | Sarraméa, New Caledonia |
| *Zeugodacus gracilis* | 1 | BGV2 | Efate, Shefa Province, Vanuatu |

## Genome assembly statistics

**Supplementary table S2** Mitochondrial genome assembly statistics for the 82 fruit flies from the Pacific Islands with the number of reads, coverage depth, nucleotide composition and length of the whole mitogenome and the control region.

| **Species** | **Sample** | **GenBank**  **Accession**  **#** | **Raw reads (millions)** | **Coverage depth (reads)** | **length (bp)** | **AT (%)** | **Control region (bp)** |
| --- | --- | --- | --- | --- | --- | --- | --- |
| *Bactrocera anomala* | BAV4 | PV604183 | 30.6 | 769 | 15,912 | 74.0 | 949 |
| *B. caledoniensis* | BNCa1 | PV604212 | 28.2 | 1,113 | 15,944 | 73.8 | 955 |
| *B. curvipennis* | BCNC1 | PV604194 | 28.3 | 1,977 | 15,928 | 72.5 | 953 |
| *B. curvipennis* | BCNC10 | PV604205 | 41.0 | 2,017 | 15,925 | 72.5 | 952 |
| *B. curvipennis* | BCNC15 | PV604216 | 28.5 | 3,681 | 15,926 | 72.5 | 953 |
| *B. curvipennis* | BCNC5 | PV604227 | 24.1 | 1,682 | 15,928 | 72.5 | 953 |
| *B. curvipennis* | BCNC7 | PV604238 | 28.4 | 1,857 | 15,926 | 72.5 | 953 |
| *B. curvipennis* | BQ112 | PV604225 | 23.3 | 2,262 | 15,927 | 72.5 | 954 |
| *B. curvipennis* | T15_06386_2 | PV604258 | 7.0 | 1,397 | 15,925 | 72.4 | 953 |
| *B. distincta* | 1B FF | PV604249 | 9.8 | 975 | 15,926 | 74.0 | 946 |
| *B. distincta* | BDF1 | PV604260 | 19.8 | 4,082 | 15,926 | 74.1 | 945 |
| *B. distincta* | BDF3 | PV604264 | 24.8 | 2,303 | 15,917 | 74.2 | 944 |
| *B. distincta* | BDF4 | PV604184 | 18.1 | 2,035 | 15,926 | 74.1 | 943 |
| *B. distincta* | BDS1 | PV604185 | 21.9 | 3,328 | 15,929 | 74.0 | 945 |
| *B. facialis* | BFT10 | PV604186 | 20.9 | 1,384 | 15,931 | 71.8 | 950 |
| *B. facialis* | BFT11 | PV604187 | 20.3 | 1,671 | 15,927 | 71.6 | 949 |
| *B. facialis* | BFT12 | PV604188 | 21.3 | 1,309 | 15,930 | 71.6 | 951 |
| *B. facialis* | BFT14 | PV604189 | 16.4 | 493 | 15,931 | 71.8 | 950 |
| *B. facialis* | BFT28 | PV604190 | 22.0 | 1,639 | 15,930 | 71.8 | 951 |
| *B. facialis* | BFT36 | PV604191 | 24.2 | 1,857 | 15,930 | 71.6 | 950 |
| *B. facialis* | BFT41 | PV604192 | 23.4 | 2,432 | 15,930 | 71.8 | 951 |
| *B. facialis* | BFT51 | PV604193 | 21.0 | 1,202 | 15,928 | 71.7 | 949 |
| *B. facialis* | BFT69 | PV604195 | 22.3 | 423 | 15,929 | 71.6 | 950 |
| *B. facialis* | BFT85 | PV604196 | 23.2 | 1,297 | 15,931 | 71.6 | 950 |
| *B. facialis* | BFT87 | PV604197 | 21.1 | 796 | 15,930 | 71.9 | 950 |
| *B. kirki* | BKS1 | PV604199 | 21.9 | 1,816 | 15,936 | 74.1 | 953 |
| *B. kirki* | BKS2 | PV604200 | 22.1 | 4,839 | 15,932 | 74.2 | 952 |
| *B. kirki* | BKS3 | PV604201 | 21.0 | 1,635 | 15,933 | 74.2 | 952 |
| *B. kirki* | BKS4 | PV604202 | 19.1 | 5,274 | 15,931 | 74.2 | 951 |
| *B. kirki* | BKS5 | PV604203 | 17.0 | 2,493 | 15,931 | 74.2 | 951 |
| *B. melanotus* | BMC10 | PV604204 | 17.6 | 1,617 | 15,944 | 73.6 | 953 |
| *B. melanotus* | BMC13 | PV604206 | 22.0 | 1,985 | 15,946 | 73.7 | 953 |
| *B. melanotus* | BMC24 | PV604207 | 22.6 | 1,315 | 15,946 | 73.7 | 953 |
| *B. melanotus* | BMC26 | PV604208 | 22.0 | 1,409 | 15,938 | 73.6 | 952 |
| *B. melanotus* | BMC4 | PV604209 | 23.4 | 1,715 | 15,952 | 73.7 | 953 |
| *B. minuta* | BMV2 | PV604210 | 22.6 | 1,669 | 15,927 | 71.9 | 949 |
| *B. neohumeralis* | BQ115 | PV604226 | 16.3 | 824 | 15,928 | 72.4 | 953 |
| *B. neohumeralis* | BQ118 | PV604228 | 16.5 | 1,117 | 15,926 | 72.4 | 952 |
| *B. neohumeralis* | BQ123 | PV604229 | 17.8 | 1,609 | 15,927 | 72.5 | 955 |
| *B. neohumeralis* | BQ127 | PV604230 | 19.6 | 1,995 | 15,928 | 72.5 | 954 |
| *B. obscura* | BOS2 | PV604212 | 16.4 | 4,752 | 15,883 | 73.5 | 950 |
| *B. passiflorae* | 3A FF | PV604213 | 10.6 | 880 | 15,928 | 71.8 | 950 |
| *B. passiflorae* | 3B FF | PV604214 | 9.8 | 1,025 | 15,928 | 71.8 | 949 |
| *B. passiflorae* | BPF15 | PV604215 | 22.7 | 1,493 | 15,927 | 71.8 | 950 |
| *B. passiflorae* | BPF3 | PV604217 | 20.0 | 2,191 | 15,931 | 71.7 | 950 |
| *B. passiflorae* | BPF4 | PV604218 | 22.3 | 1,484 | 15,930 | 71.7 | 950 |
| *B. passiflorae* | SE_02801A | PV604219 | 17.5 | 1,701 | 15,929 | 71.7 | 950 |
| *B. passiflorae* | SE_02801B | PV604220 | 20.3 | 508 | 15,931 | 71.7 | 950 |
| *B. passiflorae* | SE_02801C | PV604221 | 19.3 | 1,841 | 15,933 | 71.8 | 950 |
| *B. psidii* | BPNC1 | PV604222 | 32.2 | 906 | 15,938 | 74.2 | 951 |
| *B. psidii* | BPNC10 | PV604223 | 25.9 | 1,225 | 15,938 | 74.2 | 952 |
| *B. psidii* | BPNC16 | PV604224 | 31.3 | 941 | 15,942 | 74.2 | 952 |
| *B. trilineola* | BTV18 | PV604243 | 24.2 | 1,543 | 15,939 | 74.0 | 962 |
| *B. trilineola* | BTV2 | PV604244 | 21.4 | 1,577 | 15,929 | 74.0 | 953 |
| *B. trilineola* | BTV8 | PV604245 | 18.5 | 921 | 15,931 | 74.0 | 955 |
| *B. tryoni* | Bt 10 -C6 | PV604232 | 10.2 | 1,848 | 15,923 | 72.4 | 953 |
| *B. tryoni* | Bt 15 -C7 | PV604233 | 15.0 | 1,120 | 15,925 | 72.4 | 953 |
| *B. tryoni* | Bt 16 -C8 | PV604234 | 8.8 | 1,610 | 15,886 | 72.4 | 951 |
| *B. tryoni* | Bt 1-C2 | PV604231 | 12.0 | 1,199 | 15,928 | 72.4 | 953 |
| *B. tryoni* | Bt 2 -C3 | PV604235 | 10.2 | 886 | 15,924 | 72.4 | 953 |
| *B. tryoni* | Bt 4 -C4 | PV604236 | 11.0 | 1,449 | 15,924 | 72.4 | 953 |
| *B. tryoni* | Bt 8 -C5 | PV604237 | 9.2 | 704 | 15,926 | 72.4 | 954 |
| *B. tryoni* | BTFP1 | PV604239 | 22.4 | 921 | 15,924 | 72.4 | 952 |
| *B. tryoni* | BTNC1 | PV604240 | 23.9 | 1,087 | 15,926 | 72.4 | 954 |
| *B. tryoni* | BTNC2 | PV604241 | 24.7 | 636 | 15,929 | 72.4 | 953 |
| *B. tryoni* | BTNC3 | PV604242 | 20.6 | 649 | 15,927 | 72.4 | 954 |
| *B. tryoni* | T15_06386-16 | PV604257 | 9.6 | 932 | 15,926 | 72.5 | 953 |
| *B. tryoni* | T15_06386-28 | PV604259 | 8.8 | 1,230 | 15,927 | 72.4 | 953 |
| *B. tryoni* | T15_01099#102 | PV604261 | 8.8 | 230 | 15,927 | 72.4 | 952 |
| *B. tryoni* | T15_01099#112 | PV604262 | 10.2 | 455 | 15,926 | 72.4 | 952 |
| *B. tryoni* | T15_00905#57 | PV604263 | 9.4 | 598 | 15,927 | 72.4 | 952 |
| *B. umbrosa* | BUNC8 | PV604246 | 30.3 | 2,064 | 15,897 | 70.6 | 946 |
| *B. umbrosa* | BUV1 | PV604247 | 13.7 | 686 | 15,896 | 70.5 | 947 |
| *B. xanthodes* | 2A FF | PV604248 | 9.6 | 1,088 | 15,830 | 70.5 | 925 |
| *B. xanthodes* | 2B FF | PV604250 | 9.2 | 803 | 15,851 | 70.5 | 924 |
| *B. xanthodes* | BXC1 | PV604251 | 20.9 | 3,155 | 15,838 | 70.5 | 923 |
| *B. xanthodes* | BXF2 | PV604252 | 27.7 | 4,134 | 15,841 | 70.5 | 923 |
| *B. xanthodes* | BXFP1 | PV604253 | 23.3 | 909 | 15,834 | 70.5 | 924 |
| *B. xanthodes* | BXS2 | PV604254 | 21.5 | 2,494 | 15,838 | 70.5 | 924 |
| *Dacus aneuvittatus* | DANC1 | PV604255 | 24.2 | 2174 | 15,725 | 72.8 | 718 |
| *Dirioxa pornia* | DPNC1 | PV604256 | 32.0 | 1484 | 15,912 | 75.0 | 1,031 |
| *Zeugodacus gracilis* | BGV2 | PV604198 | 29.7 | 7,435 | 16,023 | 73.5 | 1,132 |

## Codon Usage

**Supplementary table S3** Usage of start/stop codons in fruit flies’ mitochondrial genomes sequenced in this study. Distinctive codons are highlighted in bold.

| **Species** | **ND2** | **CO1** | **CO2** | **ATP8** | **ATP6** | **CO3** | **ND3** | **ND5** | **ND4** | **ND4L** | **ND6** | **CYTB** | **ND1** |
| --- | --- | --- | --- | --- | --- | --- | --- | --- | --- | --- | --- | --- | --- |
| *Bactrocera anomala* | ATT/TAA | TCG/TA | ATG/TAA | GTG/TAA | ATG/TAA | ATG/TAA | ATT/TAG | ATT/T | ATG/TAG | ATG/TAA | ATT/TAA | ATG/TAG | ATA/T |
| *B. curvipennis* | ATT/TAA | TCG/TA | ATG/TAA | GTG/TAA | ATG/TAA | ATG/TAA | ATT/TAG | ATT/T | ATG/TAG | ATG/TAA | ATT/TAA | ATG/TAG | ATA/T |
| *B. distincta* | ATT/TAA | TCG/TA | ATG/TAA | GTG/TAA | ATG/TAA | ATG/TAA | ATG/TAG | ATT/T | ATG/TAA | ATG/TAA | ATT/TAA | ATG/TAG | ATA/T |
| *B. facialis* | ATT/TAA | TGC/TA | ATG/TAA | GTG/TAA | ATG/TAA | ATG/TAA | ATT/TAG | ATT/T | ATG/TAG | ATG/TAA | ATT/TAA | ATG/TAG | ATA/T |
| *B. kirki* | ATT/TAA | TCG/TA | ATG/TAA | GTG/TAA | ATG/TAA | ATG/TAA | ATT/TAG | ATT/T | ATG/TAG | ATG/TAA | ATT/TAA | ATG/TAG | ATA/T |
| *B. melanotus* | ATT/TAA | TGC/TA | ATG/TAA | GTG/TAA | ATG/TAA | ATG/TAA | ATT/TAG | ATT/T | ATG/TAG | ATG/TAA | ATT/TAA | ATG/TAG | ATA/T |
| *B. minuta* | ATT/TAA | TCG/TA | ATG/TAA | GTG/TAA | ATG/TAA | ATG/TAA | ATT/TAG | ATT/T | ATG/TAG | ATG/TAA | ATT/TAA | ATG/TAG | ATA/T |
| *B. caledoniensis* | ATT/TAA | TCG/TA | ATG/TAA | GTG/TAA | ATG/TAA | ATG/TAA | ATT/TAG | ATT/T | ATG/TAG | ATG/TAA | ATT/TAA | ATG/TAG | ATA/T |
| *B. neohumeralis* | ATT/TAA | TGC/TA | ATG/TAA | GTG/TAA | ATG/TAA | ATG/TAA | ATT/TAG | ATT/T | ATG/TAG | ATG/TAA | ATT/TAA | ATG/**T** | **ATT**/T |
| *B. obscura* | ATT/**TAG** | TCG/TA | ATG/TAA | GTG/TAA | ATG/TAA | ATG/TAA | ATT/TAG | ATT/T | ATG/TAG | ATG/TAA | ATT/TAA | ATG/TAG | ATA/T |
| *B. passiflorae* | ATT/TAA | TGC/TA | ATG/TAA | GTG/TAA | ATG/TAA | ATG/TAA | ATT/TAG | ATT/T | ATG/TAG | ATG/TAA | ATT/TAA | ATG/TAG | ATA/T |
| *B. psidii* | ATT/**TAG** | TCG/TA | ATG/TAA | GTG/TAA | ATG/TAA | ATG/TAA | ATT/TAG | ATT/T | ATG/TAG | ATG/TAA | ATT/TAA | ATG/TAG | ATA/T |
| *B. trilineola* | ATT/TAA | TCG/**T** | ATG/TAA | GTG/TAA | ATG/TAA | ATG/TAA | ATT/TAG | ATT/T | ATG/TAG | ATG/TAA | ATT/TAA | ATG/TAG | ATA/T |
| *B. tryoni* | ATT/TAA | TGC/TA | ATG/TAA | GTG/TAA | ATG/TAA | ATG/TAA | ATT/TAG | ATT/T | ATG/TAG | ATG/TAA | ATT/TAA | ATG/**T** | **ATT**/T |
| *B. umbrosa* | ATT/TAA | TCG/TA | ATG/TAA | **ATG**/TAA | ATG/TAA | ATG/TAA | ATT/TAG | ATT/T | ATG/TAG | ATG/TAA | ATT/TAA | ATG/TAG | ATA/T |
| *B. xanthodes* | ATT/TAA | TCG/TA | ATG/TAA | **ATC**/TAA | ATG/TAA | ATG/TAA | **ATG**/TAG | ATT/T | ATG/TAA | ATG/TAA | ATT/TAA | ATG/TAG | ATA/T |
| *Dacus aneuvittatus* | ATT/TAA | TCG/**T** | ATG/TAA | **ATC**/TAA | ATG/TAA | ATG/TAA | ATT/TAG | ATT/T | ATG/TAA | ATG/TAA | **ATC**/TAA | ATG/TAG | ATA/T |
| *Dirioxia pornia* | ATT/TAA | TCG/**T** | ATG**/TCA** | **ATT**/TAA | ATG/TAA | ATG/TAA | ATT/TAG | ATT/T | ATG/T | ATG/TAA | ATT/TAA | ATG/TAG | ATA/T |
| *Zeugodacus gracilis* | ATT/TAA | TCG/**T** | ATG/TAA | **ATC**/TAA | ATG/TAA | ATG/TAA | ATT/TAG | ATT/T | ATG/TAA | ATG/TAA | **ATC**/TAA | ATG/TAG | ATA/T |

## Primers and probes

**Supplementary table S4** Primers and probes and their targeting region in the *ND2, CO1* and *CO3* genes developed for detection of *Bactrocera curvipennis.*

| **Primer name** | **Gene** | **Primer type** | **Tm (°C)** | **Product size (bp)** | **Sequences (5’ – 3’)** |
| --- | --- | --- | --- | --- | --- |
| ND2_1133F_BC | ND2 | Forward | 45.7 | 119–189bp | TTTATCTACGACTGTGC |
| ND2_1138F_BC | ND2 | Forward | 52.9 | 114-184bp | CTACGACTATGCTTCGCG |
| ND2_1192P_BC | ND2 | Probe | 65.6 | 114-189bp | CAL610-ApdUpdUGApdUApdUAApdUpdUA  pdUCAApdCAApdCApdUpdUpdU-BHQ2plus |
| ND2_1251R_BC | ND2 | Reverse | 49.1 | 114-119bp | GGAGATAAACGATAGGACC |
| ND2_1323R_BC | ND2 | Reverse | 46.9 | 184-189pb | TTAACTTAAAGCCTTGTATGA |
| COI_1970F_BTC | COI | Forward | 53.7 | 151-224bp | TCACTTAGCTGGTATCTCATCG |
| COI_2117P_BC | COI | Probe | 57.3 | 165-172bp | CAL610-TACCAGTTTTAGCGGGAGCTATTACT  ATAC-BHQ2 |
| COI_2176R_BTC | COI | Reverse | 47.5 | 208bp | AAGGATGTATTTAAGTTTCGAT |
| CO3_5145F_BC | CO3 | Forward | 58.5 | 166-196bp | ATATGACCCCCTGCGGGA |
| CO3_5171F_BTC | CO3 | Forward | 53.2 | 140-170bp | CTTTAACCCATTCCAAATCCCA |
| CO3_5239P_BC | CO3 | Probe | 55.1 | 140-224bp | CAL610-AGCTCACCATAGTTTAATAGAAGGTA  ATCA-BHQ2 |
| CO3_5310R_BC | CO3 | Reverse | 51.5 | 166-170bp | CTAGAAGAACTGTAAAAAATAGACCC |

**Note:** Six assays were tested (the one was selected was in BOLD):

1) ND2_1133F_BC/ND2_1192P_BC+/ND2_1251R_BC;

2) ND2_1133F_BC /ND2_1192P_BC+/ND2_1323R_BC;

3) **ND2_1138F_BC /ND2_1192P_BC+/ND2_1251R_BC**;

4) COI_1970F_BTC/COI_2117P_BC/COI_2176R_BTC;

5) CO3_5154F_BC/CO3_5239P_BC/CO3_5310R_BC;

6) CO3_5171F_BTC/CO3_5239P_BC/CO3_5310R_BC.

## Optimized conditions

**Supplementary table S5** Optimised PCR mastermix composition for the duplex assay for detection of *B. curvipennis* with Applied Biosystems 18S Internal Control (Applied Biosystems Cat#4308329).

| **Master Mix composition (Multiplex)** | | **Volume per reaction (µL)** |
| --- | --- | --- |
| Water | | 4.3 |
| 2x Probe supermix | | 10.0 |
| 5 µM Primer F (300 nM) | ND2_1138F_BC | 1.2 |
| 5 µM Primer R (300 nM) | ND2_1251R_BC | 1.2 |
| 5 µM Probe (200 nM) | ND2_1192P_BC+ | 0.8 |
| 10 µM Primer F (50 nM) | Rib F | 0.1 |
| 10 µM Primer R (50 nM) | Rib R | 0.1 |
| 40 µM Probe (200 nM) | Rib Pr | 0.1 |
| BSA 10 µg/µl | | 0.2 |
| DNA template | | 2.0 |
| Total volume | | 20.0 |

**Supplementary table S6** Optimised PCR cycling conditions for the *B. curvipennis* real-time PCR assay used for further specificity and sensitivity evaluations

| **Step** | **Time** | **Temp** | **Cycles** |
| --- | --- | --- | --- |
| Initial denaturation | 2 min | 95°C | Hold |
| Denaturation | 15 sec | 95°C | } x 40 |
| Annealing and extension | 60 sec | 60°C |
|  | Plate read after each cycle | |  |

## Samples real-time PCR assay development

**Supplementary table S7** Target and non-target species used in developing a real-time PCR assay for detecting *Bactrocera curvipennis*, including results from initial specificity screening, assay optimization, blind panel testing, and multiplex validation. Quantification cycle (Cq) thresholds are reported as the mean of technical replicates, with 0 indicating no amplification.

| **Organism name** | **Sample Reference number** | **Country of origin** | **Life stage** | **Lure or Host** | **Sample source1** | **DNA extraction2** | **Initial specificity** | **Assay optimization** | **Specificity** | **Blind test** | **Multiplex** | **Internal control (18S)** |
| --- | --- | --- | --- | --- | --- | --- | --- | --- | --- | --- | --- | --- |
| *Bactrocera alquilonis* | BQ17 | Australia | Adult | Unknown | Collection | DNeasy | 0 | 0 |  |  |  |  |
| *B. alquilonis* | BQ21 | Australia | Adult | Unknown | Collection | DNeasy |  |  |  | 0 |  |  |
| *B. anomala* | BAV2 | Vanuatu | Adult | Cue-Lure | Collection | DNeasy |  |  | 0 |  |  |  |
| *B. caledoniensis* | BNCa2 | New Caledonia | Adult | MDF trap3 | Collection | DNeasy | 0 |  |  |  |  |  |
| *B. caledoniensis* | BNCa3 | New Caledonia | Adult | MDF trap3 | Collection | DNeasy |  |  |  | 0 |  | 28.1 |
| *B. carambolae* | INDN H1 | Indonesia | Larvae | *Podophyllum peltatum* | Border | DNeasy |  |  | 0 |  |  |  |
| *B. correcta* | C19_00291 | Singapore | Larvae | *Ziziphus jujuba* | Border | DNeasy | 0 |  | 0 |  |  |  |
| *B. curvipennis* | BCNC10 | New Caledonia | Adult | *Ximenia americana* | Collection | DNeasy |  | 18.7 |  |  |  |  |
| *B. curvipennis* | BCNC11 | New Caledonia | Adult | *Ximenia americana* | Collection | DNeasy |  | 20.2 |  |  |  |  |
| *B. curvipennis* | BCNC12 | New Caledonia | Adult | *Ximenia americana* | Collection | DNeasy |  |  |  | 20.5 | 19.1 | 20.4 |
| *B. curvipennis* | BCNC13 | New Caledonia | Adult | *Ximenia americana* | Collection | DNeasy |  |  | 21.8 |  |  |  |
| *B. curvipennis* | BCNC14 | New Caledonia | Adult | *Ximenia americana* | Collection | DNeasy |  |  |  | 18.6 |  |  |
| *B. curvipennis* | BCNC2 | New Caledonia | Adult | *Ximenia americana* | Collection | DNeasy |  |  | 18.2 |  |  |  |
| *B. curvipennis* | BCNC3 | New Caledonia | Adult | *Ximenia americana* | Collection | DNeasy |  |  |  | 23.8 |  |  |
| *B. curvipennis* | BCNC4 | New Caledonia | Adult | *Ximenia americana* | Collection | DNeasy |  |  |  |  | 22.3 | 19 |
| *B. curvipennis* | BCNC5 | New Caledonia | Adult | *Ximenia americana* | Collection | DNeasy |  | 16.9 |  |  | 16.9 | 18.7 |
| *B. curvipennis* | BCNC6 | New Caledonia | Adult | *Ximenia americana* | Collection | DNeasy |  |  |  |  | 22.4 | 19.1 |
| *B. curvipennis* | BCNC7 | New Caledonia | Adult | *Ximenia americana* | Collection | DNeasy |  | 23.8 |  |  |  |  |
| *B. curvipennis* | BCNC8 | New Caledonia | Adult | *Ximenia americana* | Collection | DNeasy |  |  |  | 24.7 | 23.3 | 23.3 |
| *B. curvipennis* | BCNC9 | New Caledonia | Adult | *Ximenia americana* | Collection | DNeasy |  |  | 20.5 |  |  |  |
| *B. curvipennis* | BQ112 | New Caledonia | Adult | Cue-Lure | Collection | DNeasy | 20.4 | 21.4 |  |  |  |  |
| *B. curvipennis* | T15_06386 | New Caledonia | Pupae | *Rubus* sp. | Border | DNeasy |  |  | 18.6 |  |  |  |
| *B. distincta* | BDF6 | Fiji | Adult | Cue-Lure | Collection | DNeasy |  |  | 0 |  |  |  |
| *B. distincta* | BDS2 | Samoa | Adult | Unknown | Collection | DNeasy |  |  |  | 0 |  |  |
| *B. distincta* | BDT1 | Tonga | Adult | Unknown | Collection | DNeasy | 0 |  |  |  |  | 21.1 |
| *B. dorsalis* | T18_02202 | China | Adult | FF traps | Collection | DNeasy |  |  |  | 0 | 0 | 22.1 |
| *B. dorsalis* | T19_0659313 | Vietnam | Larvae | *Nephelium lappaceum* | Border | DNeasy |  |  |  |  | 0 | 19.7 |
| *B. dorsalis* | T23_00420 | Unknown | Larvae | *Litchi chinensis* | Border | DNeasy |  |  |  |  | 0 | 28.2 |
| *B. dorsalis* complex | BDFP1 | French Polynesia | Adult | Unknown | Collection | DNeasy | 0 |  |  |  |  | 22.7 |
| *B. dorsalis* complex | T19_6923 | Thailand | Larvae | *Dimocarpus longan* | Border | DNeasy |  |  | 0 |  |  |  |
| *B. dorsalis complex* | T24_02010 | Taiwan | Egg | *Litchi chinensis* | Border | DNeasy |  |  |  |  | 0 | 21.9 |
| *B. facialis* (clade1) | BFT39 | Tonga | Adult | Cue-Lure | Collection | PrepGEM |  |  | 0 |  |  |  |
| *B. facialis* (clade1) | BFT61 | Tonga | Adult | Cue-Lure | Collection | PrepGEM |  |  |  | 0 |  |  |
| *B. facialis* (clade2) | BFT13 | Tonga | Adult | Cue-Lure | Collection | PrepGEM | 0 |  |  |  |  |  |
| *B. facialis* (clade2*)* | BFT71 | Tonga | Adult | Cue-Lure | Collection | PrepGEM |  |  |  |  | 0 | 24 |
| *B. jarvisi* | T15_0063a | Australia | Larvae | *Mangifera indica* | Border | DNeasy | 0 |  |  |  |  |  |
| *B. jarvisi* | T17_04198 | Australia | Larvae | *Mangifera indica* | Border | DNeasy |  |  | 0 |  |  |  |
| *B. jarvisi* | T24_00686 | Australia | Larvae | *Mangifera indica* | Border | DNeasy |  |  |  |  | 0 | 26.2 |
| *B. kirki* | BKS5 | Samoa | Adult | Unknown | Collection | DNeasy |  |  | 0 |  |  |  |
| *B. kirki* | BKT2 | Tonga | Adult | FF traps | Collection | DNeasy |  |  |  | 0 |  | 28.1 |
| *B. kirki* | T20_00489 | Tonga | Larvae | *Ficus carica* | Border | DNeasy | 0 |  |  |  |  |  |
| *B. latifrons* | T18_02583 | Malaysia | Pupae | *Capsicum* sp. | Border | DNeasy |  |  | 0 |  |  | 21.7 |
| *B. melanotus* | BMC17 | Cook Islands | Adult | Unknown | Collection | DNeasy |  |  | 0 |  |  |  |
| *B. melanotus* | BMC27 | Cook Islands | Adult | Unknown | Collection | DNeasy |  |  |  | 0 |  |  |
| *B. melanotus* | BMC9 | Cook Islands | Adult | Unknown | Collection | DNeasy | 0 |  |  |  |  |  |
| *B. minuta* | BMV6 | Vanuatu | Adult | Cue-Lure | Collection | DNeasy |  |  |  | 0 |  |  |
| *B. minuta* | BMV9 | Vanuatu | Adult | Cue-Lure | Collection | DNeasy | 0 |  |  |  |  | 30.9 |
| *B. mucrons* | BMNC1 | New Caledonia | Adult | MDF trap3 | Collection | DNeasy | 0 |  |  |  |  | 23.9 |
| *B. neohumeralis* | BNA2 | Australia | Adult | Cue-Lure | Collection | DNeasy |  |  | 0 |  |  |  |
| *B. neohumeralis* | BQ115 | Australia | Adult | *Syzygium* sp. | Border | DNeasy | 0 | 0 |  |  |  |  |
| *B. neohumeralis* | BQ118 | Australia | Adult | *Syzygium* sp. | Collection | DNeasy |  |  | 0 |  |  | 25 |
| *B. neohumeralis* | BQ123 | Australia | Adult | Laboratory colony | Border | DNeasy |  | 0 |  |  |  |  |
| *B. neohumeralis* | BQ127 | Australia | Adult | Laboratory colony | Border | DNeasy | 0 | 0 |  |  |  |  |
| *B. neohumeralis* | BQ132 | Australia | Adult | Unknown | Collection | DNeasy |  |  | 0 |  | 0 | 18.9 |
| *B. obscura* | BOS5 | Samoa | Adult | Unknown | Collection | DNeasy | 0 |  |  |  |  | 38.9 |
| *B. paraxanthodes* | DIP 04/16_A | New Caledonia | Adult | Laboratory colony | Collection | DNeasy |  |  | 0 |  |  |  |
| *B. passiflorae* | BPF13 | Fiji | Adult | Cue-Lure | Collection | DNeasy |  |  | 0 |  |  |  |
| *B. passiflorae* | BPF16 | Fiji | Adult | Cue-Lure | Collection | DNeasy |  |  |  | 0 |  |  |
| *B. passiflorae* | SE_02801B | Fiji | Adult | Cue-Lure | Collection | DNeasy | 0 |  |  |  |  |  |
| *B. passiflorae* | T24_02220 | Fiji | Larvae | *Syzygium malaccense* | Border | DNeasy |  |  |  |  | 0 | 23.2 |
| *B. psidii* | BPNC1 | New Caledonia | Adult | Malaise trap | Collection | DNeasy | 0 |  |  |  |  | 23.3 |
| *B. psidii* | BPNC17 | New Caledonia | Adult | *Psidium guajava* | Collection | DNeasy |  |  |  |  | 0 | 19.9 |
| *B. psidii* | BPNC6 | New Caledonia | Adult | Laboratory colony | Collection | DNeasy |  |  | 0 |  |  |  |
| *B. psidii* | BPNC9 | New Caledonia | Adult | Laboratory colony | Collection | DNeasy |  |  |  | 0 |  |  |
| *B. scutellata* | T18_02201 | China | Adult | Fruit Fly traps | Collection | DNeasy |  |  |  |  | 0 | 21.9 |
| *B. trilineola* | BTV16 | Vanuatu | Adult | Cue-Lure | Collection | DNeasy |  |  | 0 |  |  |  |
| *B. trilineola* | BTV45 | Vanuatu | Adult | Cue-Lure | Collection | DNeasy |  |  |  | 0 |  |  |
| *B. trilineola* | BTV55 | Vanuatu | Adult | Cue-Lure | Collection | DNeasy | 0 |  |  |  |  |  |
| *B. tryoni* | T20_00284 | Australia | Larvae | *Mangifera indica* | Border | DNeasy |  |  |  | 0 |  |  |
| *B. tryoni* | T20_00284A | Australia | Larvae | *Mangifera indica* | Border | DNeasy |  |  | 0 |  |  | 20.4 |
| *B. tryoni* | T22_02819 | Australia | Eggs | *Fragaria* sp. | Border | DNeasy |  |  |  |  | 0 | 22.2 |
| *B. tryoni* | T24_01197 | Australia | Larvae | *Mangifera indica* | Border | DNeasy |  |  |  |  | 0 | 29.0 |
| *B. tryoni* | BTFP1 | French Polynesia | Adult | Unknown | Collection | DNeasy |  | 0 |  |  |  |  |
| *B. tryoni* | BTFP12 | French Polynesia | Adult | Unknown | Collection | DNeasy |  |  | 0 |  |  |  |
| *B. tryoni* | BTFP15 | French Polynesia | Adult | Unknown | Collection | DNeasy | 0 | 0 |  |  |  |  |
| *B. tryoni* | BTFP19 | French Polynesia | Adult | Unknown | Collection | DNeasy |  |  |  | 0 |  |  |
| *B. tryoni* | BTFP4 | French Polynesia | Adult | Unknown | Collection | DNeasy | 0 |  |  |  |  |  |
| *B. tryoni* | BTT16(4) | French Polynesia | Adult | Unknown | Collection | DNeasy |  |  |  |  | 0 | 21.1 |
| *B. tryoni* | BTNC10 | New Caledonia | Adult | *Psidium guajava* | Collection | DNeasy |  |  |  | 0 |  |  |
| *B. tryoni* | BTNC14 | New Caledonia | Adult | Laboratory colony | Collection | DNeasy |  |  | 0 |  |  | 20.3 |
| *B. tryoni* | BTNC7 | New Caledonia | Adult | *Psidium guajava* | Collection | DNeasy |  |  | 0 |  |  |  |
| *B. tryoni* complex | T22_00275 | Australia | Larvae | *Litchi chinensis* | Border | DNeasy |  |  |  |  | 0 | 23.9 |
| *B. tryoni* complex | T22_00275 | Australia | Larvae | *Litchi chinensis* | Border | DNeasy |  |  |  |  | 0 | 23.2 |
| *B. tryoni* complex | T22_00530 | Australia | Larvae | *Litchi chinensis* | Border | DNeasy |  |  |  |  | 0 | 26.1 |
| *B. tryoni* complex | T22_03599 | Australia | Larvae | *Mangifera indica* | Border | DNeasy |  |  |  |  | 0 | 25.4 |
| *B. tryoni* complex | T22_03599 | Australia | Larvae | *Mangifera indica* | Border | DNeasy |  |  |  |  | 0 | 23.5 |
| *B. tryoni* complex | T23_00633 | Australia | Eggs | *Litchi chinensis* | Border | DNeasy |  |  |  |  | 0 | 28.4 |
| *B. tryoni* complex | T23_00790 | Australia | Eggs | *Litchi chinensis* | Border | DNeasy |  |  |  |  | 0 | 28.4 |
| *B. tryoni* complex | T23_01006 | Australia | Eggs | *Litchi chinensis* | Border | DNeasy |  |  |  |  | 0 | 25.5 |
| *B. tryoni* complex | T23_03604 | Australia | Larvae | *Citrus x siniensis* | Border | DNeasy |  |  |  |  | 0 | 21.6 |
| *B. umbrosa* | BUNC5 | New Caledonia | Adult | *Artocarpus heterophyllus* | Collection | DNeasy |  |  |  | 0 |  |  |
| *B. umbrosa* | BUV14 | Vanuatu | Adult | Methyl eugenol | Collection | DNeasy | 0 |  |  |  |  | 23.7 |
| *B. umbrosa* | BUV7 | Vanuatu | Adult | Methyl eugenol | Collection | DNeasy |  |  | 0 |  |  |  |
| *B. xanthodes* | BXF4 | Fiji | Adult | Methyl eugenol | Collection | DNeasy |  |  |  | 0 |  |  |
| *B. xanthodes* | T20_02837B | Fiji | Larvae | *Artocarpus altilis* | Border | DNeasy |  |  | 0 |  |  |  |
| *B. xanthodes* | T23_02922 | Fiji | Larvae | *Artocarpus altilis* | Border | DNeasy |  |  |  |  | 0 | 21.6 |
| *B. xanthodes* | BXFP3 | French Polynesia | Adult | Unknown | Collection | DNeasy |  |  | 0 |  |  |  |
| *B. xanthodes* | BXFP5 | French Polynesia | Adult | Unknown | Collection | DNeasy | 0 |  |  |  |  | 23.8 |
| *B. xanthodes* | T17_02953 | Samoa | Larvae | *Artocarpus altilis* | Border | DNeasy |  |  | 0 |  | 0 | 19.4 |
| *B. zonata* | BQ27 | Sri Lanka | Adult | Laboratory colony | Border | DNeasy | 0 |  |  |  |  |  |
| *Ceratitis capitata* | CQ3 | Hawai |  | Laboratory colony | Collection | DNeasy |  |  |  |  | 0 | 20.4 |
| *Dacus aneuvittatus* | DANC5 | New Caledonia | Adult | Laboratory colony | Collection | DNeasy |  |  |  | 0 |  | 23.7 |
| *Dirioxa pornia* | DPNC2 | New Caledonia | Adult | *Psidium guajava* | Collection | DNeasy |  |  | 38.2 |  |  | 25.3 |
| *Zeugodacus. gracialis* | BGV2 | Vanuatu | Adult | Cue-Lure | Collection | DNeasy |  |  | 0 |  |  |  |

1Overseas collection or border interception

2DNA extraction method of Qiagen Blood and Tissue kit (DNeasy) and PrepGEM were used for the samples.

3Medium-density fibreboard (MDF)

## Repeatability and reproducibility

**Supplementary table S8** Reproducibility of *B. curvipennis* real-time PCR assay. Data from the positive control standardisation of five repeat for each concentration on two thermocyclers.

|  | **Repeatability (%CV)1** | | **Reproducibility (%CV)2** |
| --- | --- | --- | --- |
| **Bac_TC_allin_control** | **Run 1** | **Run 2** | **Run 1 ∼Run 2** |
| 1000000 copies/µl | 0.75 | 0.88 | 2.57 |
| 100000 copies/µl | 0.13 | 0.82 | 1.86 |
| 10000 copies/µl | 0.41 | 0.44 | 1.53 |
| 1000 copies/µl | 0.39 | 0.51 | 0.52 |
| 100 copies/µl | 0.39 | 0.74 | 0.56 |
| 10 copies/µl | 0.22 | 0.16 | 0.31 |
| 1 copy/µl | 0.91 | 0.99 | 0.98 |
| **Measurement of uncertainty (MU)3** | 0.36 | | |

1 Repeatability: percentage coefficient of variation (%CV) for intra-run repeatability

2Reproducibility: percentage coefficient of variation (%CV) for inter-run repeatability

3Measurement of uncertainty:

**Supplementary table S9** Taxonomic information, geographical source, and GenBank accession numbers for mitochondrial genome sequences from tephritid taxa used in the present analyses.

| **Accession** | **Subfamilily** | **Tribe** | **Species** | **Topology** | **Country of origin** |
| --- | --- | --- | --- | --- | --- |
| MT036766.1 | Dacinae | Ceratitidini | *Ceratitis anonae* | circular | Cameroon |
| MT036767.1 | Dacinae | Ceratitidini | *C. anonae* | circular | Cameroon |
| MT036768.1 | Dacinae | Ceratitidini | *C. anonae* | circular | Cameroon |
| MT036765.1 | Dacinae | Ceratitidini | *C. anonae* | circular | Cameroon |
| MT036781.1 | Dacinae | Ceratitidini | *C. bremii* | circular | Guinea |
| NC_000857.1 | Dacinae | Ceratitidini | *C. capitata* | circular | Greece |
| MT036782.1 | Dacinae | Ceratitidini | *C. capitata* | circular | Kenya |
| ON861815.1 | Dacinae | Ceratitidini | *C. capitata* | circular | South Africa |
| ON861816.1 | Dacinae | Ceratitidini | *C. capitata* | circular | South Africa |
| NC_071251.1 | Dacinae | Ceratitidini | *C. cosyra* | circular | South Africa |
| ON861818.1 | Dacinae | Ceratitidini | *C. cosyra* | circular | South Africa |
| MT036783.1 | Dacinae | Ceratitidini | *C. cosyra* | circular | Sudan |
| MT036784.1 | Dacinae | Ceratitidini | *C. cosyra* | circular | Zimbabwe |
| MT036785.1 | Dacinae | Ceratitidini | *C. ditissima* | circular | Nigeria |
| MT036769.1 | Dacinae | Ceratitidini | *C. fasciventris* | circular | Burundi |
| MT036770.1 | Dacinae | Ceratitidini | *C. fasciventris* | circular | Burundi |
| MT036771.1 | Dacinae | Ceratitidini | *C. fasciventris* | circular | Burundi |
| MT036772.1 | Dacinae | Ceratitidini | *C. fasciventris* | circular | Burundi |
| MT036773.1 | Dacinae | Ceratitidini | *C. fasciventris* | circular | Burundi |
| NC_035497.1 | Dacinae | Ceratitidini | *C. fasciventris* | circular | Kenya |
| MT036774.1 | Dacinae | Ceratitidini | *C. pallidula* | circular | Tanzania |
| MT036775.1 | Dacinae | Ceratitidini | *C. pallidula* | circular | Tanzania |
| MT036786.1 | Dacinae | Ceratitidini | *C. punctata* | circular | Guinea |
| MT036787.1 | Dacinae | Ceratitidini | *C. querita* | circular | Kenya |
| MT036776.1 | Dacinae | Ceratitidini | *C. quilicii* | circular | Tanzania |
| MT036777.1 | Dacinae | Ceratitidini | *C. quilicii* | circular | Tanzania |
| MT036778.1 | Dacinae | Ceratitidini | *C. quilicii* | circular | Tanzania |
| MT036779.1 | Dacinae | Ceratitidini | *C. quilicii* | circular | Tanzania |
| MT036780.1 | Dacinae | Ceratitidini | *C. quilicii* | circular | Tanzania |
| NC_053846.1 | Dacinae | Ceratitidini | *C. quilicii* | circular | Tanzania |
| ON861819.1 | Dacinae | Ceratitidini | *C. quilicii* | circular | Tanzania |
| ON861820.1 | Dacinae | Ceratitidini | *C. quilicii* | circular | Tanzania |
| MT036788.1 | Dacinae | Ceratitidini | *C. quinaria* | circular | Sudan |
| MT036800.1 | Dacinae | Ceratitidini | *C. rosa* | circular | China |
| MT036790.1 | Dacinae | Ceratitidini | *C. rosa* | circular | South Africa |
| MT036791.1 | Dacinae | Ceratitidini | *C. rosa* | circular | South Africa |
| MT036792.1 | Dacinae | Ceratitidini | *C. rosa* | circular | South Africa |
| MT036793.1 | Dacinae | Ceratitidini | *C. rosa* | circular | South Africa |
| MT036794.1 | Dacinae | Ceratitidini | *C. rosa* | circular | South Africa |
| MT036795.1 | Dacinae | Ceratitidini | *C. rosa* | circular | South Africa |
| ON861821.1 | Dacinae | Ceratitidini | *C. rosa* | circular | South Africa |
| ON861822.1 | Dacinae | Ceratitidini | *C. rosa* | circular | South Africa |
| MT036796.1 | Dacinae | Ceratitidini | *C. rosa* | circular | Tanzania |
| MT036797.1 | Dacinae | Ceratitidini | *C. rosa* | circular | Tanzania |
| MT036798.1 | Dacinae | Ceratitidini | *C. rosa* | circular | Tanzania |
| MT036799.1 | Dacinae | Ceratitidini | *C. rosa* | circular | Tanzania |
| NC_053847.1 | Dacinae | Ceratitidini | *C. rosa* | circular | Tanzania |
| MT036789.1 | Dacinae | Ceratitidini | *C. rubivora* | circular | Tanzania |
| MF434829.1 | Dacinae | Ceratitidini | *Neoceratitis asiatica* | circular | China |
| MH374118.1 | Dacinae | Dacini | *Bactrocerea albistrigata* | circular | Indonesia |
| NC_028327.1 | Dacinae | Dacini | *B. arecae* | circular | Malaysia |
| NC_042712.1 | Dacinae | Dacini | *B. biguttula* | circular | South Africa |
| NC_071745.1 | Dacinae | Dacini | *B. bryoniae* | circular | Papua New Guinea |
| MG916967.1 | Dacinae | Dacini | *B. carambolae* | circular | Greece |
| MT121278.1 | Dacinae | Dacini | *B. carambolae* | circular | Indonesia |
| MT121279.1 | Dacinae | Dacini | *B. carambolae* | circular | Indonesia |
| MT121280.1 | Dacinae | Dacini | *B. carambolae* | circular | Indonesia |
| MT121281.1 | Dacinae | Dacini | *B. carambolae* | circular | Indonesia |
| MT121282.1 | Dacinae | Dacini | *B. carambolae* | circular | Indonesia |
| MT121283.1 | Dacinae | Dacini | *B. carambolae* | circular | Indonesia |
| NC_009772.1 | Dacinae | Dacini | *B. carambolae* | circular | Japan |
| MN104218.1 | Dacinae | Dacini | *B. carambolae* | linear | Malaysia |
| MN104219.1 | Dacinae | Dacini | *B. carambolae* | circular | Malaysia |
| MT121286.1 | Dacinae | Dacini | *B. carambolae* | circular | Philippines |
| MN104217.1 | Dacinae | Dacini | *B. carambolae* | circular | Suriname |
| OR085849.1 | Dacinae | Dacini | *B. cinnabaria* | circular | Malaysia |
| MT121259.1 | Dacinae | Dacini | *B. correcta* | circular | China |
| NC_018787.1 | Dacinae | Dacini | *B. correcta* | circular | China |
| NC_071737.1 | Dacinae | Dacini | *B. curvifera* | circular | Papua New Guinea |
| DQ917577.1 | Dacinae | Dacini | *B. dorsalis* | circular | China |
| MT121284.1 | Dacinae | Dacini | *B. dorsalis* | circular | China |
| MT121304.1 | Dacinae | Dacini | *B. dorsalis* | circular | China |
| MT121305.1 | Dacinae | Dacini | *B. dorsalis* | circular | China |
| MT121306.1 | Dacinae | Dacini | *B. dorsalis* | circular | China |
| NC_008748.1 | Dacinae | Dacini | *B. dorsalis* | circular | China |
| PP485725.1 | Dacinae | Dacini | *B. dorsalis* | circular | China |
| PP485726.1 | Dacinae | Dacini | *B. dorsalis* | circular | China |
| PP485727.1 | Dacinae | Dacini | *B. dorsalis* | circular | China |
| PP485728.1 | Dacinae | Dacini | *B. dorsalis* | circular | China |
| PP485729.1 | Dacinae | Dacini | *B. dorsalis* | circular | China |
| PP485730.1 | Dacinae | Dacini | *B. dorsalis* | circular | China |
| PP485731.1 | Dacinae | Dacini | *B. dorsalis* | circular | China |
| PP485732.1 | Dacinae | Dacini | *B. dorsalis* | circular | China |
| PP485733.1 | Dacinae | Dacini | *B. dorsalis* | circular | China |
| PP485734.1 | Dacinae | Dacini | *B. dorsalis* | circular | China |
| PP485735.1 | Dacinae | Dacini | *B. dorsalis* | circular | China |
| PP485736.1 | Dacinae | Dacini | *B. dorsalis* | circular | China |
| PP485737.1 | Dacinae | Dacini | *B. dorsalis* | circular | China |
| PP485738.1 | Dacinae | Dacini | *B. dorsalis* | circular | China |
| PP485739.1 | Dacinae | Dacini | *B. dorsalis* | circular | China |
| PP485740.1 | Dacinae | Dacini | *B. dorsalis* | circular | China |
| PP485741.1 | Dacinae | Dacini | *B. dorsalis* | circular | China |
| PP485742.1 | Dacinae | Dacini | *B. dorsalis* | circular | China |
| PP485743.1 | Dacinae | Dacini | *B. dorsalis* | circular | China |
| PP485744.1 | Dacinae | Dacini | *B. dorsalis* | circular | China |
| PP485745.1 | Dacinae | Dacini | *B. dorsalis* | circular | China |
| PP485746.1 | Dacinae | Dacini | *B. dorsalis* | circular | China |
| PP485747.1 | Dacinae | Dacini | *B. dorsalis* | circular | China |
| PP485748.1 | Dacinae | Dacini | *B. dorsalis* | circular | China |
| PP485749.1 | Dacinae | Dacini | *B. dorsalis* | circular | China |
| PP485750.1 | Dacinae | Dacini | *B. dorsalis* | circular | China |
| PP485751.1 | Dacinae | Dacini | *B. dorsalis* | circular | China |
| PP485752.1 | Dacinae | Dacini | *B. dorsalis* | circular | China |
| PP485753.1 | Dacinae | Dacini | *B. dorsalis* | circular | China |
| PP485754.1 | Dacinae | Dacini | *B. dorsalis* | circular | China |
| PP485755.1 | Dacinae | Dacini | *B. dorsalis* | circular | China |
| PP485756.1 | Dacinae | Dacini | *B. dorsalis* | circular | China |
| PP485757.1 | Dacinae | Dacini | *B. dorsalis* | circular | China |
| PP485758.1 | Dacinae | Dacini | *B. dorsalis* | circular | China |
| PP485759.1 | Dacinae | Dacini | *B. dorsalis* | circular | China |
| PP485760.1 | Dacinae | Dacini | *B. dorsalis* | circular | China |
| PP485761.1 | Dacinae | Dacini | *B. dorsalis* | circular | China |
| PP485762.1 | Dacinae | Dacini | *B. dorsalis* | circular | China |
| PP485763.1 | Dacinae | Dacini | *B. dorsalis* | circular | China |
| PP485764.1 | Dacinae | Dacini | *B. dorsalis* | circular | China |
| PP485765.1 | Dacinae | Dacini | *B. dorsalis* | circular | China |
| PP485766.1 | Dacinae | Dacini | *B. dorsalis* | circular | China |
| PP485767.1 | Dacinae | Dacini | *B. dorsalis* | circular | China |
| PP485768.1 | Dacinae | Dacini | *B. dorsalis* | circular | China |
| PP485769.1 | Dacinae | Dacini | *B. dorsalis* | circular | China |
| PP485770.1 | Dacinae | Dacini | *B. dorsalis* | circular | China |
| PP485771.1 | Dacinae | Dacini | *B. dorsalis* | circular | China |
| PP485772.1 | Dacinae | Dacini | *B. dorsalis* | circular | China |
| PP485773.1 | Dacinae | Dacini | *B. dorsalis* | circular | China |
| PP485774.1 | Dacinae | Dacini | *B. dorsalis* | circular | China |
| PP485775.1 | Dacinae | Dacini | *B. dorsalis* | circular | China |
| PP485776.1 | Dacinae | Dacini | *B. dorsalis* | circular | China |
| PP485777.1 | Dacinae | Dacini | *B. dorsalis* | circular | China |
| PP485778.1 | Dacinae | Dacini | *B. dorsalis* | circular | China |
| PP485779.1 | Dacinae | Dacini | *B. dorsalis* | circular | China |
| PP485780.1 | Dacinae | Dacini | *B. dorsalis* | circular | China |
| PP485781.1 | Dacinae | Dacini | *B. dorsalis* | circular | China |
| PP485782.1 | Dacinae | Dacini | *B. dorsalis* | circular | China |
| PP485783.1 | Dacinae | Dacini | *B. dorsalis* | circular | China |
| PP485784.1 | Dacinae | Dacini | *B. dorsalis* | circular | China |
| PP485785.1 | Dacinae | Dacini | *B. dorsalis* | circular | China |
| PP485786.1 | Dacinae | Dacini | *B. dorsalis* | circular | China |
| PP485787.1 | Dacinae | Dacini | *B. dorsalis* | circular | China |
| PP485788.1 | Dacinae | Dacini | *B. dorsalis* | circular | China |
| PP485789.1 | Dacinae | Dacini | *B. dorsalis* | circular | China |
| PP485790.1 | Dacinae | Dacini | *B. dorsalis* | circular | China |
| PP485791.1 | Dacinae | Dacini | *B. dorsalis* | circular | China |
| PP485792.1 | Dacinae | Dacini | *B. dorsalis* | circular | China |
| PP485793.1 | Dacinae | Dacini | *B. dorsalis* | circular | China |
| PP485794.1 | Dacinae | Dacini | *B. dorsalis* | circular | China |
| PP485795.1 | Dacinae | Dacini | *B. dorsalis* | circular | China |
| PP485796.1 | Dacinae | Dacini | *B. dorsalis* | circular | China |
| PP485797.1 | Dacinae | Dacini | *B. dorsalis* | circular | China |
| PP485798.1 | Dacinae | Dacini | *B. dorsalis* | circular | China |
| PP485799.1 | Dacinae | Dacini | *B. dorsalis* | circular | China |
| PP485800.1 | Dacinae | Dacini | *B. dorsalis* | circular | China |
| PP485801.1 | Dacinae | Dacini | *B. dorsalis* | circular | China |
| PP485802.1 | Dacinae | Dacini | *B. dorsalis* | circular | China |
| PP485803.1 | Dacinae | Dacini | *B. dorsalis* | circular | China |
| PP485804.1 | Dacinae | Dacini | *B. dorsalis* | circular | China |
| PP485805.1 | Dacinae | Dacini | *B. dorsalis* | circular | China |
| PP485806.1 | Dacinae | Dacini | *B. dorsalis* | circular | China |
| PP485807.1 | Dacinae | Dacini | *B. dorsalis* | circular | China |
| PP485808.1 | Dacinae | Dacini | *B. dorsalis* | circular | China |
| PP485809.1 | Dacinae | Dacini | *B. dorsalis* | circular | China |
| PP485810.1 | Dacinae | Dacini | *B. dorsalis* | circular | China |
| PP485811.1 | Dacinae | Dacini | *B. dorsalis* | circular | China |
| PP485812.1 | Dacinae | Dacini | *B. dorsalis* | circular | China |
| PP485813.1 | Dacinae | Dacini | *B. dorsalis* | circular | China |
| PP485814.1 | Dacinae | Dacini | *B. dorsalis* | circular | China |
| PP485815.1 | Dacinae | Dacini | *B. dorsalis* | circular | China |
| PP485816.1 | Dacinae | Dacini | *B. dorsalis* | circular | China |
| PP485817.1 | Dacinae | Dacini | *B. dorsalis* | circular | China |
| PP485818.1 | Dacinae | Dacini | *B. dorsalis* | circular | China |
| PP485819.1 | Dacinae | Dacini | *B. dorsalis* | circular | China |
| PP485820.1 | Dacinae | Dacini | *B. dorsalis* | circular | China |
| PP485821.1 | Dacinae | Dacini | *B. dorsalis* | circular | China |
| PP485822.1 | Dacinae | Dacini | *B. dorsalis* | circular | China |
| PP485823.1 | Dacinae | Dacini | *B. dorsalis* | circular | China |
| PP485824.1 | Dacinae | Dacini | *B. dorsalis* | circular | China |
| PP485825.1 | Dacinae | Dacini | *B. dorsalis* | circular | China |
| PP485826.1 | Dacinae | Dacini | *B. dorsalis* | circular | China |
| PP485827.1 | Dacinae | Dacini | *B. dorsalis* | circular | China |
| PP485828.1 | Dacinae | Dacini | *B. dorsalis* | circular | China |
| PP485829.1 | Dacinae | Dacini | *B. dorsalis* | circular | China |
| PP485830.1 | Dacinae | Dacini | *B. dorsalis* | circular | China |
| PP485831.1 | Dacinae | Dacini | *B. dorsalis* | circular | China |
| PP485832.1 | Dacinae | Dacini | *B. dorsalis* | circular | China |
| PP485833.1 | Dacinae | Dacini | *B. dorsalis* | circular | China |
| PP485834.1 | Dacinae | Dacini | *B. dorsalis* | circular | China |
| PP485835.1 | Dacinae | Dacini | *B. dorsalis* | circular | China |
| PP485836.1 | Dacinae | Dacini | *B. dorsalis* | circular | China |
| PP485837.1 | Dacinae | Dacini | *B. dorsalis* | circular | China |
| PP485838.1 | Dacinae | Dacini | *B. dorsalis* | circular | China |
| PP485839.1 | Dacinae | Dacini | *B. dorsalis* | circular | China |
| PP485840.1 | Dacinae | Dacini | *B. dorsalis* | circular | China |
| MT121298.1 | Dacinae | Dacini | *B. dorsalis* | circular | India |
| MT121299.1 | Dacinae | Dacini | *B. dorsalis* | circular | India |
| MT121300.1 | Dacinae | Dacini | *B. dorsalis* | circular | India |
| MT121287.1 | Dacinae | Dacini | *B. dorsalis* | circular | Indonesia |
| MT121288.1 | Dacinae | Dacini | *B. dorsalis* | circular | Indonesia |
| MT121289.1 | Dacinae | Dacini | *B. dorsalis* | circular | Indonesia |
| MT121290.1 | Dacinae | Dacini | *B. dorsalis* | circular | Indonesia |
| MT121291.1 | Dacinae | Dacini | *B. dorsalis* | circular | Indonesia |
| KX534207.1 | Dacinae | Dacini | *B. dorsalis* | circular | Kenya |
| MN104220.1 | Dacinae | Dacini | *B. dorsalis* | circular | Kenya |
| DQ917578.1 | Dacinae | Dacini | *B. dorsalis* | circular | Malaysia |
| MT121295.1 | Dacinae | Dacini | *B. dorsalis* | circular | Mali |
| MT121296.1 | Dacinae | Dacini | *B. dorsalis* | circular | Mali |
| MT121297.1 | Dacinae | Dacini | *B. dorsalis* | circular | Mali |
| MT121292.1 | Dacinae | Dacini | *B. dorsalis* | circular | Myanmar |
| MT121293.1 | Dacinae | Dacini | *B. dorsalis* | circular | Myanmar |
| MT121294.1 | Dacinae | Dacini | *B. dorsalis* | circular | Myanmar |
| DQ995281.1 | Dacinae | Dacini | *B. dorsalis* | circular | Philippines |
| MT121285.1 | Dacinae | Dacini | *B. dorsalis* | circular | South Africa |
| ON861823.1 | Dacinae | Dacini | *B. dorsalis* | circular | South Africa |
| ON861824.1 | Dacinae | Dacini | *B. dorsalis* | circular | South Africa |
| MT121301.1 | Dacinae | Dacini | *B. dorsalis* | circular | Uganda |
| MT121302.1 | Dacinae | Dacini | *B. dorsalis* | circular | Uganda |
| MT121303.1 | Dacinae | Dacini | *B. dorsalis* | circular | Uganda |
| MT121307.1 | Dacinae | Dacini | *B. dorsalis* | circular | USA: Hawaii |
| MT121308.1 | Dacinae | Dacini | *B. dorsalis* | circular | USA: Hawaii |
| MT121309.1 | Dacinae | Dacini | *B. dorsalis* | circular | USA: Hawaii |
| KM244662.1 | Dacinae | Dacini | *B. dorsalis* | linear |  |
| KT343905.1 | Dacinae | Dacini | *B. dorsalis* | circular |  |
| MG916968.1 | Dacinae | Dacini | *B. dorsalis* | circular |  |
| NC_062138.1 | Dacinae | Dacini | *B. frauenfeldi* | circular | Australia |
| MT121261.1 | Dacinae | Dacini | *B. frauenfeldi* | circular | Papua New Guinea |
| NC_071738.1 | Dacinae | Dacini | *B. fulvicauda* | circular | Papua New Guinea |
| MT121263.1 | Dacinae | Dacini | *B. latifrons* | circular | China |
| NC_029466.1 | Dacinae | Dacini | *B. latifrons* | circular | Malaysia |
| NC_037722.1 | Dacinae | Dacini | *B. limbifera* | circular | Indonesia |
| NC_029467.1 | Dacinae | Dacini | *B. melastomatos* | circular | Malaysia |
| MT121264.1 | Dacinae | Dacini | *B. minax* | circular | China |
| NC_014402.1 | Dacinae | Dacini | *B. minax* | circular | China |
| NC_071739.1 | Dacinae | Dacini | *B. moluccensis* | circular | Papua New Guinea |
| NC_071740.1 | Dacinae | Dacini | *B. musae* | circular | Papua New Guinea |
| MZ520733.1 | Dacinae | Dacini | *B. neohumeralis* | circular | Australia |
| MZ520734.1 | Dacinae | Dacini | *B. neohumeralis* | circular | Australia |
| MZ520735.1 | Dacinae | Dacini | *B. neohumeralis* | circular | Australia |
| MZ520736.1 | Dacinae | Dacini | *B. neohumeralis* | circular | Australia |
| NC_062139.1 | Dacinae | Dacini | *B. neohumeralis* | circular | Australia |
| NC_071741.1 | Dacinae | Dacini | *B. nigrotibialis* | circular | India |
| NC_071742.1 | Dacinae | Dacini | *B. occipitalis* | circular | Philippines |
| GU108468.1 | Dacinae | Dacini | *B. oleae* | circular | Algeria |
| KR677101.1 | Dacinae | Dacini | *B. oleae* | circular | Iran |
| KR677102.1 | Dacinae | Dacini | *B. oleae* | circular | Iran |
| KR677103.1 | Dacinae | Dacini | *B. oleae* | circular | Iran |
| KR677104.1 | Dacinae | Dacini | *B. oleae* | circular | Iran |
| KR677105.1 | Dacinae | Dacini | *B. oleae* | circular | Iran |
| KR677106.1 | Dacinae | Dacini | *B. oleae* | circular | Iran |
| KR677107.1 | Dacinae | Dacini | *B. oleae* | circular | Iran |
| GU108460.1 | Dacinae | Dacini | *B. oleae* | circular | Israel |
| GU108472.1 | Dacinae | Dacini | *B. oleae* | circular | Israel |
| AY210703.1 | Dacinae | Dacini | *B. oleae* | circular | Italy |
| GU108459.1 | Dacinae | Dacini | *B. oleae* | circular | Italy |
| GU108464.1 | Dacinae | Dacini | *B. oleae* | circular | Italy |
| GU108470.1 | Dacinae | Dacini | *B. oleae* | circular | Italy |
| GU108471.1 | Dacinae | Dacini | *B. oleae* | circular | Italy |
| MT121269.1 | Dacinae | Dacini | *B. oleae* | circular | Italy |
| GU108466.1 | Dacinae | Dacini | *B. oleae* | circular | Kenya |
| GU108476.1 | Dacinae | Dacini | *B. oleae* | circular | Kenya |
| GU108474.1 | Dacinae | Dacini | *B. oleae* | circular | Morocco |
| GU108463.1 | Dacinae | Dacini | *B. oleae* | circular | Pakistan |
| GU108469.1 | Dacinae | Dacini | *B. oleae* | circular | Pakistan |
| GU108477.1 | Dacinae | Dacini | *B. oleae* | circular | Pakistan |
| GU108473.1 | Dacinae | Dacini | *B. oleae* | circular | Portugal |
| NC_005333.1 | Dacinae | Dacini | *B. oleae* | circular | Portugal |
| GU108462.1 | Dacinae | Dacini | *B. oleae* | circular | South Africa |
| GU108478.1 | Dacinae | Dacini | *B. oleae* | circular | South Africa |
| GU108461.1 | Dacinae | Dacini | *B. oleae* | circular | Turkey |
| GU108465.1 | Dacinae | Dacini | *B. oleae* | circular | Turkey |
| CM090314.1 | Dacinae | Dacini | *B. oleae* | circular | USA |
| GU108475.1 | Dacinae | Dacini | *B. oleae* | circular | USA |
| GU108479.1 | Dacinae | Dacini | *B. oleae* | circular | USA |
| GU108467.1 | Dacinae | Dacini | *B. oleae* | circular | Italy |
| OR085850.1 | Dacinae | Dacini | *B. propinqua* | circular | Malaysia |
| NC_037723.1 | Dacinae | Dacini | *B. ritsemai* | circular | Indonesia |
| MT121270.1 | Dacinae | Dacini | *B. rubigina* | circular | China |
| NC_046521.1 | Dacinae | Dacini | *B. rubigina* | circular | China |
| NC_046952.1 | Dacinae | Dacini | *B. ruiliensis* | circular | China |
| OK127889.1 | Dacinae | Dacini | *B. sp. 'yunnanensis'* | circular | China |
| MT121271.1 | Dacinae | Dacini | *B. thailandica* | circular | China |
| NC_053983.1 | Dacinae | Dacini | *B. thailandica* | circular | China |
| MZ520738.1 | Dacinae | Dacini | *B. tryoni* | circular | Australia |
| MZ520737.1 | Dacinae | Dacini | *B. tryoni* | circular | Australia |
| MT121272.1 | Dacinae | Dacini | *B. tryoni* | circular | IAEA Laboratory strain |
| NC_014611.1 | Dacinae | Dacini | *B. tryoni* | circular |  |
| MN883026.1 | Dacinae | Dacini | *B. tsuneonis* | circular | China |
| MN539610.1 | Dacinae | Dacini | *B. tsuneonis* | circular | China |
| NC_038164.1 | Dacinae | Dacini | *B. tsuneonis* | circular | China |
| MT196006.1 | Dacinae | Dacini | *B. tuberculata* | linear | China |
| NC_071743.1 | Dacinae | Dacini | *B. tuberculata* | circular | China |
| MT121274.1 | Dacinae | Dacini | *B. umbrosa* | circular | Indonesia |
| NC_029468.1 | Dacinae | Dacini | *B. umbrosa* | circular | Malaysia |
| MT121275.1 | Dacinae | Dacini | *B. umbrosa* | circular | Papua New Guinea |
| NC_071744.1 | Dacinae | Dacini | *B. wuzhishana* | circular | China |
| MT121277.1 | Dacinae | Dacini | *B. zonata* | circular | India |
| NC_027725.1 | Dacinae | Dacini | *B. zonata* | circular | India |
| MN583036.1 | Dacinae | Dacini | *B. zonata* | circular | Iran |
| NC_071725.1 | Dacinae | Dacini | *Dacus armatus* | circular | Ghana |
| NC_071726.1 | Dacinae | Dacini | *D. axanus* | circular | Papua New Guinea |
| NC_046468.1 | Dacinae | Dacini | *D. bivittatus* | circular | South Africa |
| MG962405.1 | Dacinae | Dacini | *D. ciliatus* | linear | Iran |
| NC_043843.1 | Dacinae | Dacini | *D. conopsoides* | circular | Indonesia |
| NC_071727.1 | Dacinae | Dacini | *D. durbanensis* | circular | South Africa |
| NC_071728.1 | Dacinae | Dacini | *D. eclipsis* | circular | South Africa |
| MZ087939.1 | Dacinae | Dacini | *D. haikouensis* | circular | China |
| NC_071729.1 | Dacinae | Dacini | *D. humeralis* | circular | Ghana |
| MT121244.1 | Dacinae | Dacini | *D. longicornis* | circular | China |
| NC_032690.1 | Dacinae | Dacini | *D. longicornis* | circular | China |
| NC_053984.1 | Dacinae | Dacini | *D. trimacula* | circular | China |
| MK940811.1 | Dacinae | Dacini | *D. trimacula* | circular | China |
| MT121245.1 | Dacinae | Dacini | *D. trimacula* | circular | China |
| NC_071730.1 | Dacinae | Dacini | *D. venetatus* | circular | South Africa |
| NC_061932.1 | Dacinae | Dacini | *D. vijaysegarani* | circular | Malaysia |
| NC_079944.1 | Dacinae | Dacini | *Zeugodacus calumniatus* | circular | Malaysia |
| KT625492.2 | Dacinae | Dacini | *Z. caudatus* | circular | Indonesia |
| KT625491.2 | Dacinae | Dacini | *Z. caudatus* | circular | Malaysia |
| NC_062801.1 | Dacinae | Dacini | *Z. caudatus* | circular |  |
| MT121248.1 | Dacinae | Dacini | *Z. cilifer* | circular | China |
| NC_052852.1 | Dacinae | Dacini | *Z. cilifer* | circular |  |
| MT121249.1 | Dacinae | Dacini | *Z. cucurbitae* | circular | Bangladesh |
| MH900082.1 | Dacinae | Dacini | *Z. cucurbitae* | linear | China |
| NC_016056.1 | Dacinae | Dacini | *Z. cucurbitae* | circular | China |
| OQ158899.1 | Dacinae | Dacini | *Z. cucurbitae* | circular | Wildtype lab colony |
| NC_071732.1 | Dacinae | Dacini | *Z. depressus* | circular | China |
| MT477832.1 | Dacinae | Dacini | *Z. depressus* | circular | China |
| KY131831.1 | Dacinae | Dacini | *Z. depressus* | circular |  |
| KT159730.1 | Dacinae | Dacini | *Z. diaphorus* | circular | China |
| MT121251.1 | Dacinae | Dacini | *Z. diaphorus* | circular | China |
| NC_071733.1 | Dacinae | Dacini | *Z. diversus* | circular | China |
| NC_079945.1 | Dacinae | Dacini | *Z. heinrichi* | circular | Malaysia |
| NC_071734.1 | Dacinae | Dacini | *Z. hochii* | circular | China |
| OQ730415.1 | Dacinae | Dacini | *Z. hochii* | circular | Malaysia |
| NC_067083.1 | Dacinae | Dacini | *Z. mukiae* | circular | China |
| NC_049063.1 | Dacinae | Dacini | *Z. proprediaphora* | circular | China |
| NC_071735.1 | Dacinae | Dacini | *Z. rubellus* | circular | China |
| MH900080.1 | Dacinae | Dacini | *Z. scutellaris* | linear | China |
| MT121255.1 | Dacinae | Dacini | *Z. scutellaris* | circular | China |
| NC_061658.1 | Dacinae | Dacini | *Z. scutellaris* | circular | China |
| MF358969.1 | Dacinae | Dacini | *Z. scutellatus* | circular | China |
| KT159731.1 | Dacinae | Dacini | *Z. scutellatus* | circular | China |
| MT121256.1 | Dacinae | Dacini | *Z. scutellatus* | circular | China |
| NC_027254.1 | Dacinae | Dacini | *Z. scutellatus* | circular | China |
| NC_062140.1 | Dacinae | Dacini | *Z. strigifinis* | circular | Australia |
| MT121257.1 | Dacinae | Dacini | *Z. tau* | circular | Bangladesh |
| MF966383.1 | Dacinae | Dacini | *Z. tau* | circular | China |
| MH900081.1 | Dacinae | Dacini | *Z. tau* | circular | China |
| NC_027290.1 | Dacinae | Dacini | *Z. tau* | circular | China |
| MF966384.1 | Dacinae | Dacini | *Z. tau* | circular | Malaysia |
| NC_071736.1 | Dacinae | Dacini | *Z. triangularis* | circular | Papua New Guinea |
| NC_071731.1 | Dacinae | Dacini | *Zeugodacus atrifacies* | circular | China |
| MH900079.1 | Dacinae | Gastrozonini | *Acrotaeniostola dissimilis* | circular | China |
| NC_052851.1 | Phytalmiinae | Acanthonevrini | *Felderimyia fuscipennis* | circular | China |
| NC_020463.1 | Tephritinae | Cecidocharini | *Procecidochares utilis* | circular | China |
| OK127891.1 | Tephritinae | Cecidocharini | *Procecidochares utilis* | circular | China |
| OZ060076.1 | Tephritinae | Tephritini | *Campiglossa producta* | linear | United Kingdom |
| NC_071720.1 | Trypetinae | Carpomyini | *Carpomya incompleta* | circular | Italy |
| MN095236.1 | Trypetinae | Carpomyini | *C. vesuviana* | linear | China |
| MT121231.1 | Trypetinae | Carpomyini | *C. vesuviana* | circular | China |
| NC_071721.1 | Trypetinae | Carpomyini | *C. vesuviana* | circular | Iran |
| NC_087865.1 | Trypetinae | Carpomyini | *Myiopardalis pardalina* | circular | China |
| MT121234.1 | Trypetinae | Carpomyini | *Ragholetis batava* | circular | Mongolia |
| NC_071722.1 | Trypetinae | Carpomyini | *R. batava* | circular | Mongolia |
| MT121233.1 | Trypetinae | Carpomyini | *R. batava* | circular | Mongolia |
| MW027532.1 | Trypetinae | Carpomyini | *R. cerasi* | circular | Austria |
| NC_061399.1 | Trypetinae | Carpomyini | *R. cerasi* | circular | Hungary |
| MT121236.1 | Trypetinae | Carpomyini | *R. cerasi* | circular | Italy |
| MT121235.1 | Trypetinae | Carpomyini | *R. cerasi* | circular | Italy |
| MW027531.1 | Trypetinae | Carpomyini | *R. cerasi* | circular | Italy |
| MW027530.1 | Trypetinae | Carpomyini | *R. cerasi* | circular | Vienna |
| NC_071723.1 | Trypetinae | Carpomyini | *R. completa* | circular | Italy |
| MN443930.1 | Trypetinae | Carpomyini | *R. cornivora* | circular | USA |
| MN443931.1 | Trypetinae | Carpomyini | *R. cornivora* | circular | USA |
| MN443939.1 | Trypetinae | Carpomyini | *R. mendax* | circular | USA |
| MN443932.1 | Trypetinae | Carpomyini | *R. pomonella* | circular | USA |
| MN443933.1 | Trypetinae | Carpomyini | *R. pomonella* | circular | USA |
| MN443934.1 | Trypetinae | Carpomyini | *R. pomonella* | linear | USA |
| MN443935.1 | Trypetinae | Carpomyini | *R. pomonella* | circular | USA |
| MN443936.1 | Trypetinae | Carpomyini | *R. pomonella* | circular | USA |
| MN443937.1 | Trypetinae | Carpomyini | *R. pomonella* | circular | USA |
| MN443938.1 | Trypetinae | Carpomyini | *R. pomonella* | circular | USA |
| NC_071724.1 | Trypetinae | Carpomyini | *R. pomonella* | circular | USA |
| MN443945.1 | Trypetinae | Carpomyini | *R. zephyria* | circular | USA |
| MN443940.1 | Trypetinae | Carpomyini | *R. zephyria* | circular | USA |
| MN443941.1 | Trypetinae | Carpomyini | *R. zephyria* | circular | USA |
| MN443942.1 | Trypetinae | Carpomyini | *R. zephyria* | circular | USA |
| MN443943.1 | Trypetinae | Carpomyini | *R. zephyria* | circular | USA |
| MN443944.1 | Trypetinae | Carpomyini | *R. zephyria* | circular | USA |
| NC_071713.1 | Trypetinae | Toxotrypanini | *Anastrepha distincta* | circular | Colombia |
| MT121221.1 | Trypetinae | Toxotrypanini | *A. fraterculus* | circular | Colombia |
| NC_034912.1 | Trypetinae | Toxotrypanini | *A. fraterculus* | circular | Colombia |
| MT121223.1 | Trypetinae | Toxotrypanini | *A. ludens* | circular | Mexico |
| NC_071714.1 | Trypetinae | Toxotrypanini | *A. ludens* | circular | Mexico |
| CM051870.1 | Trypetinae | Toxotrypanini | *A. ludens* | circular | USA Laboratory strain |
| CM051344.1 | Trypetinae | Toxotrypanini | *A. obliqua* | circular | Colombia |
| NC_071715.1 | Trypetinae | Toxotrypanini | *A. obliqua* | circular | Colombia |
| NC_071716.1 | Trypetinae | Toxotrypanini | *A. ornata* | circular | Colombia |
| NC_071717.1 | Trypetinae | Toxotrypanini | *A. serpentina* | circular | Colombia |
| NC_071718.1 | Trypetinae | Toxotrypanini | *A. striata* | circular | Colombia |
| NC_071719.1 | Trypetinae | Toxotrypanini | *A. suspensa* | circular | Mexico |
| NC_001322.1 | Drosophilinae | Drosophilini | *Drosophila yakuba* | circular | USA |

# SUPPLEMENTARY FIGURES

## Comparison phylogenetic tree by genus


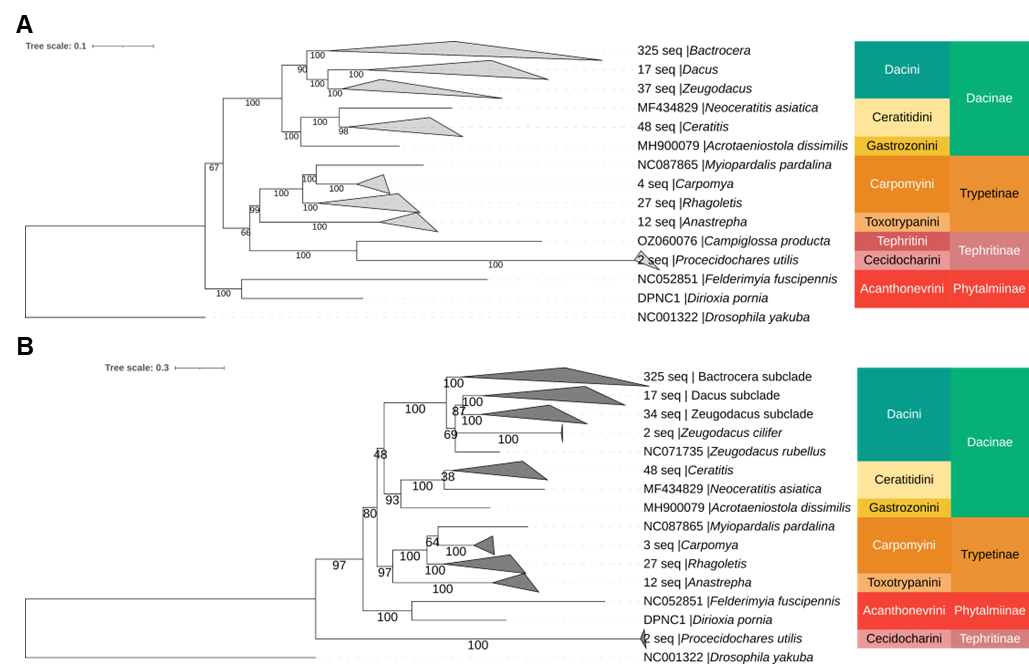


**Supplementary figure S1** Reconstructed phylogenetic tree of Tephritidae fruit flies inferred from the (**A**) whole mitogenome dataset using IQ-TREE, (**B**) PCGs dataset with partitions using RAxML. Maximum likelihood (ML) bootstrap support values are shown at each node. Genus clades have been collapsed to improve visualization of the tree’s topology. The number of specimens used in each collapsed clade is specified. Coloured strips denote tribes and subfamilies.

## Complete phylogenetic tree (PCGs)


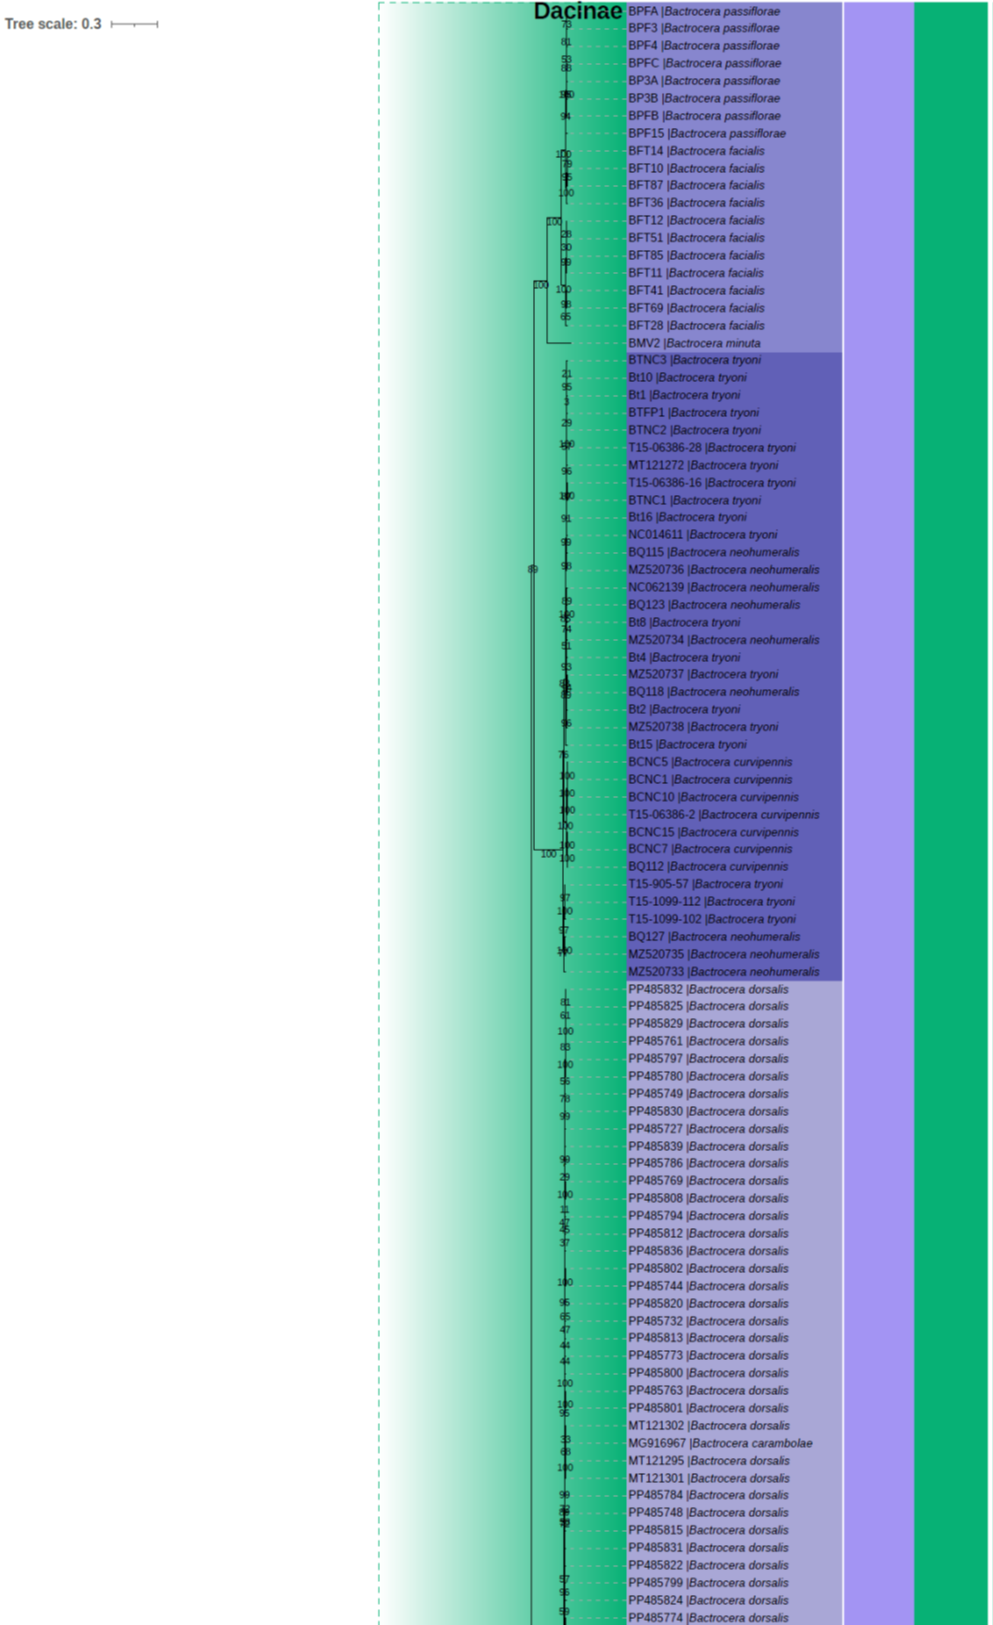


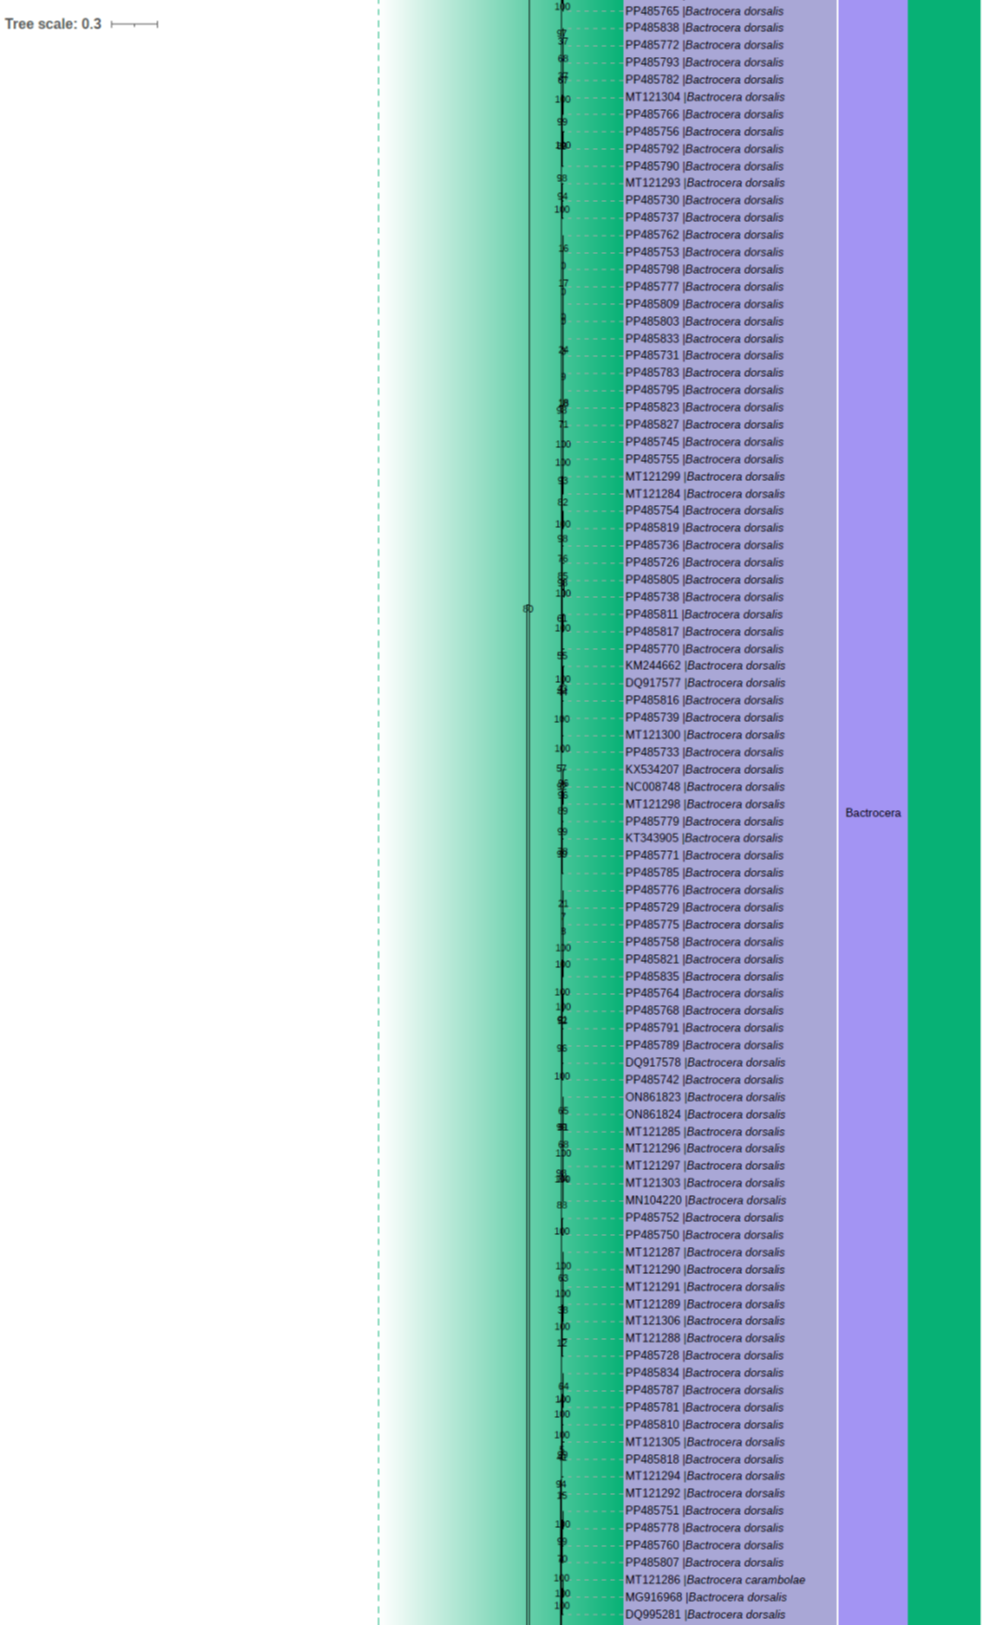


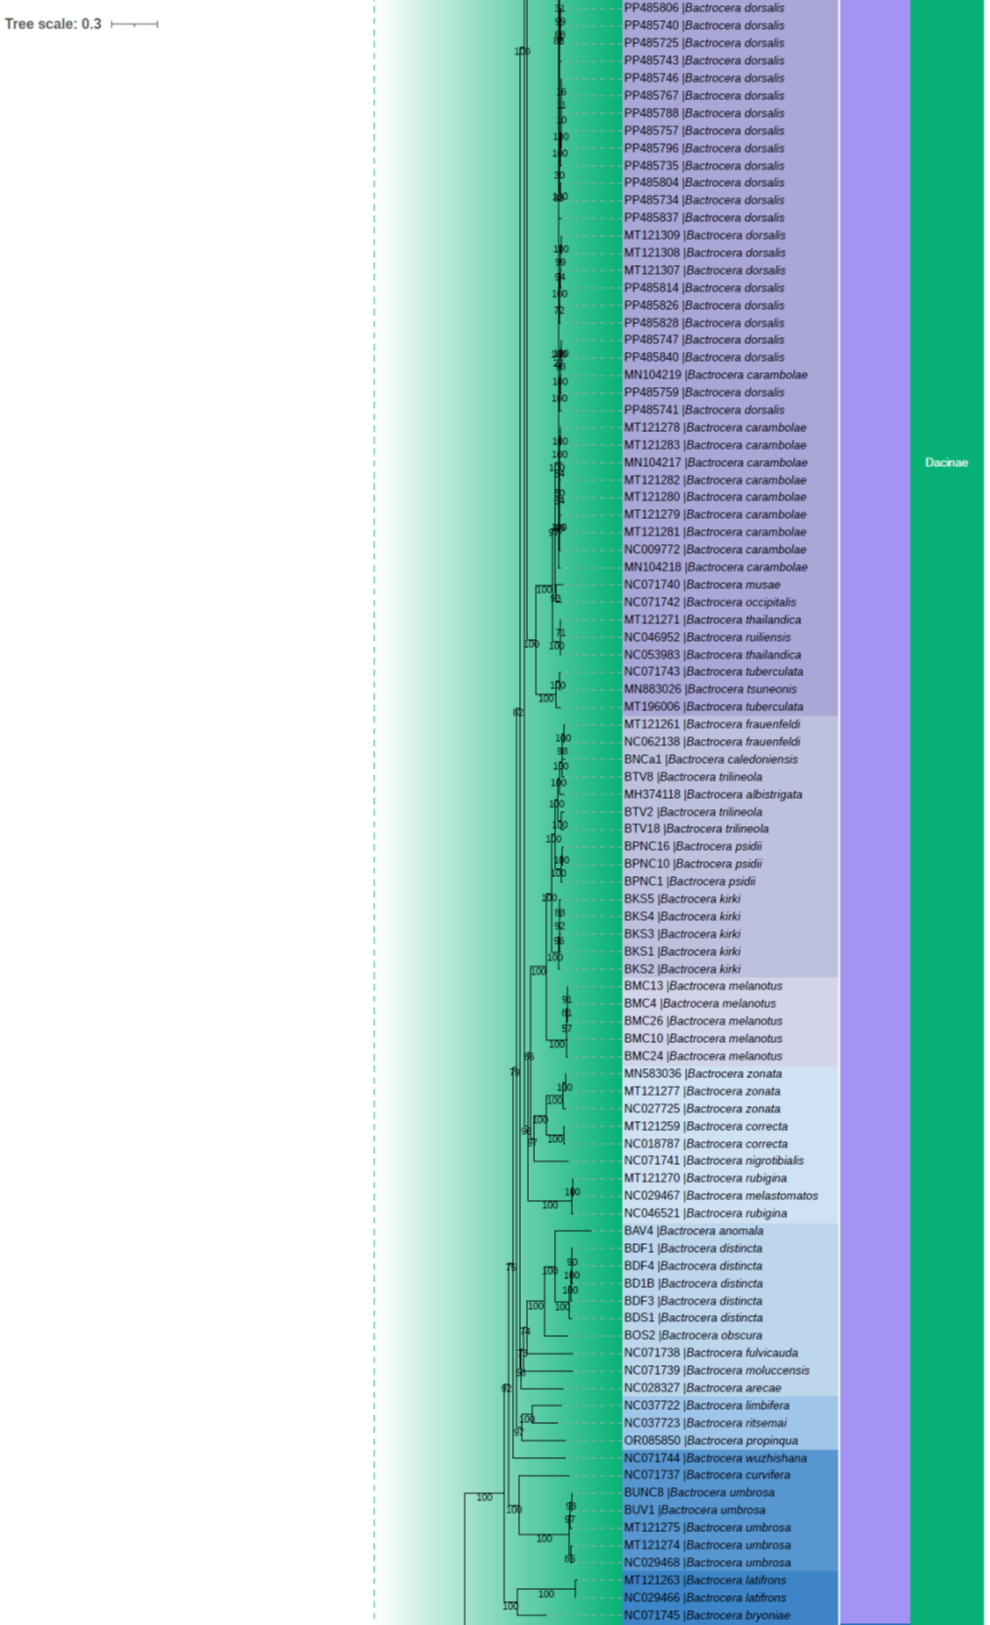


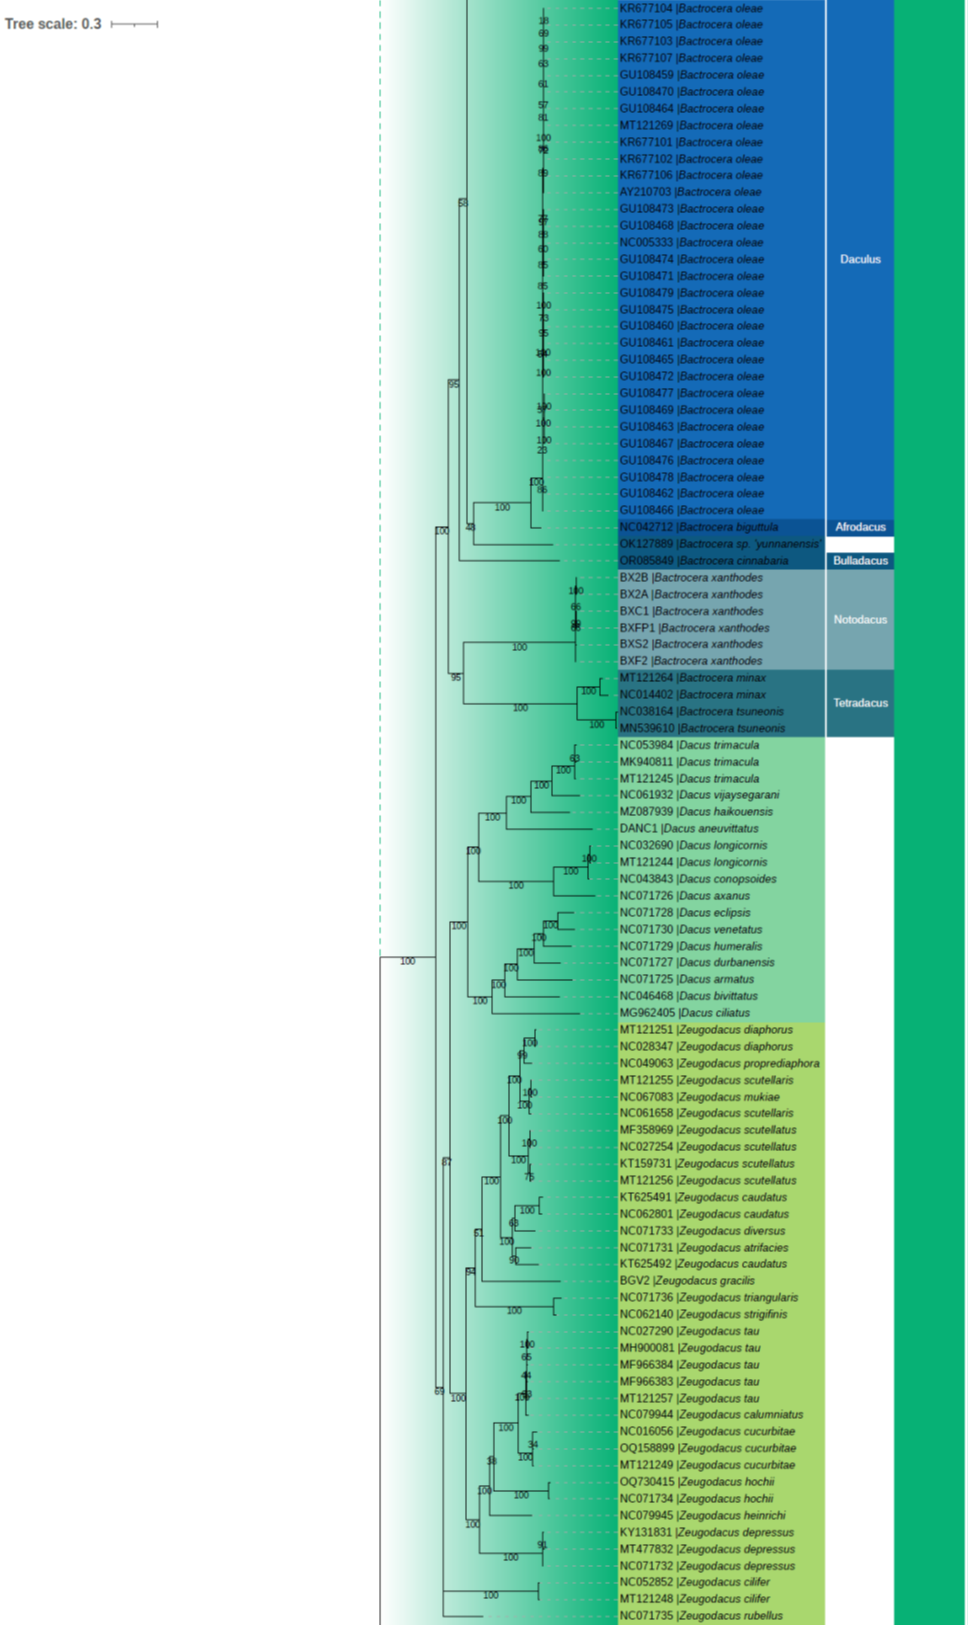


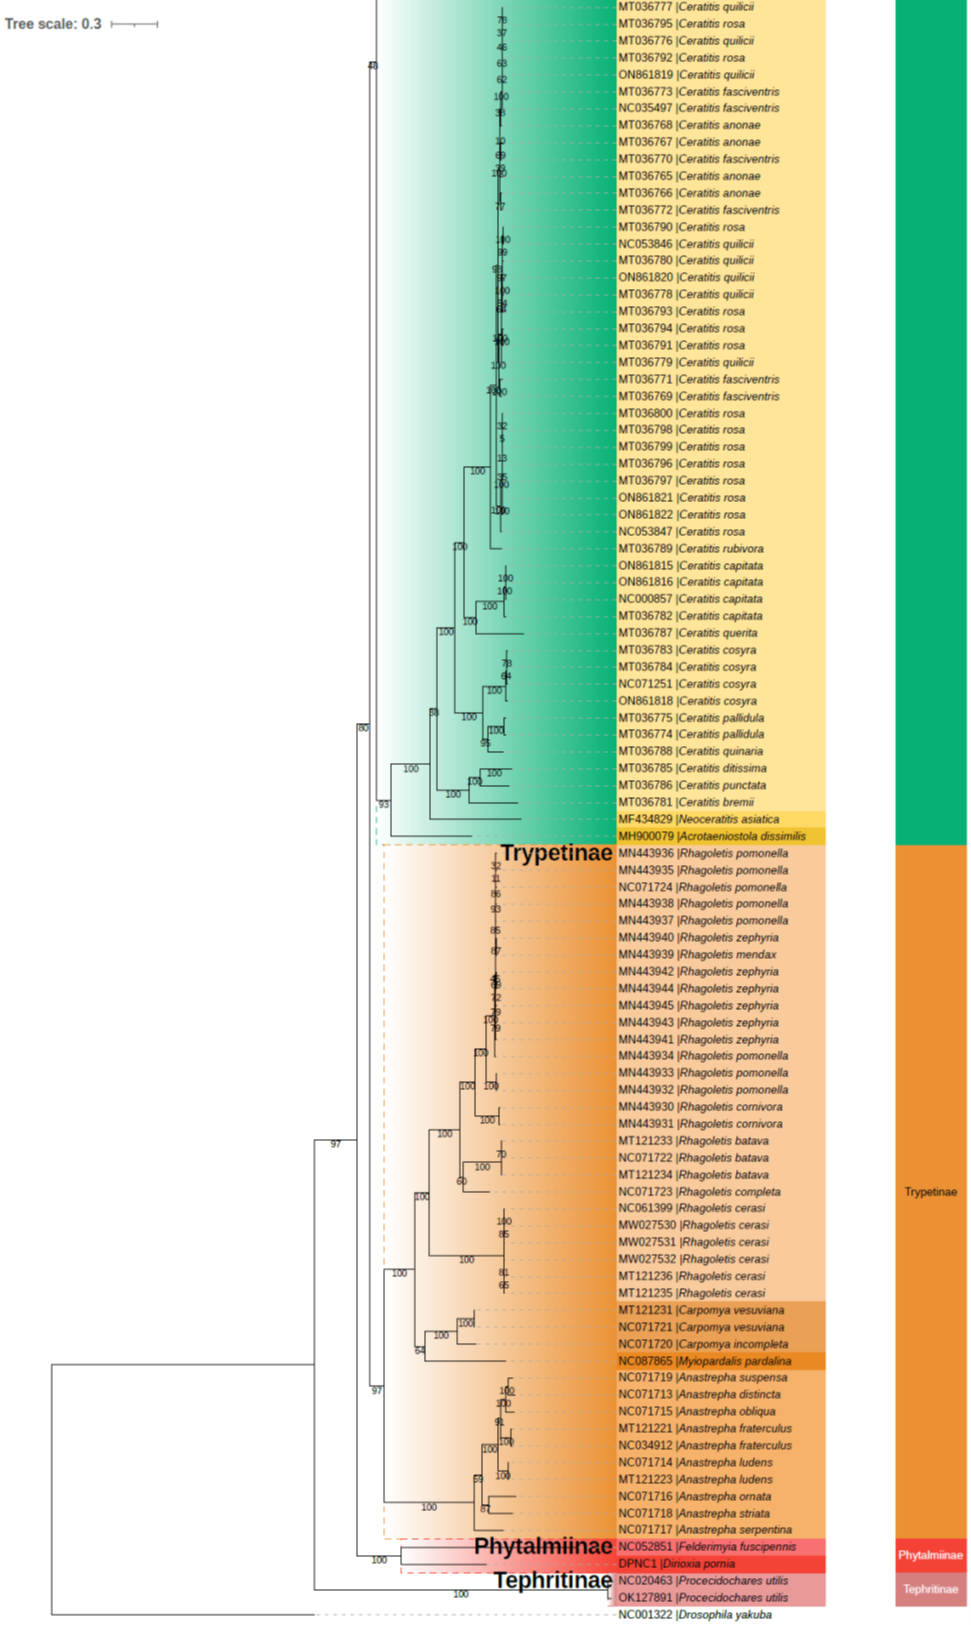


**Supplementary figure S2** Reconstructed phylogenetic tree of Tephritidae fruit flies inferred from the PCGs dataset with partitions using RAxML. Maximum likelihood (ML) bootstrap support values are shown at each node. Coloured strips denote tribes and subgenera of *Bactrocera* genus.

## Synonymous and non-synonymous substitutions


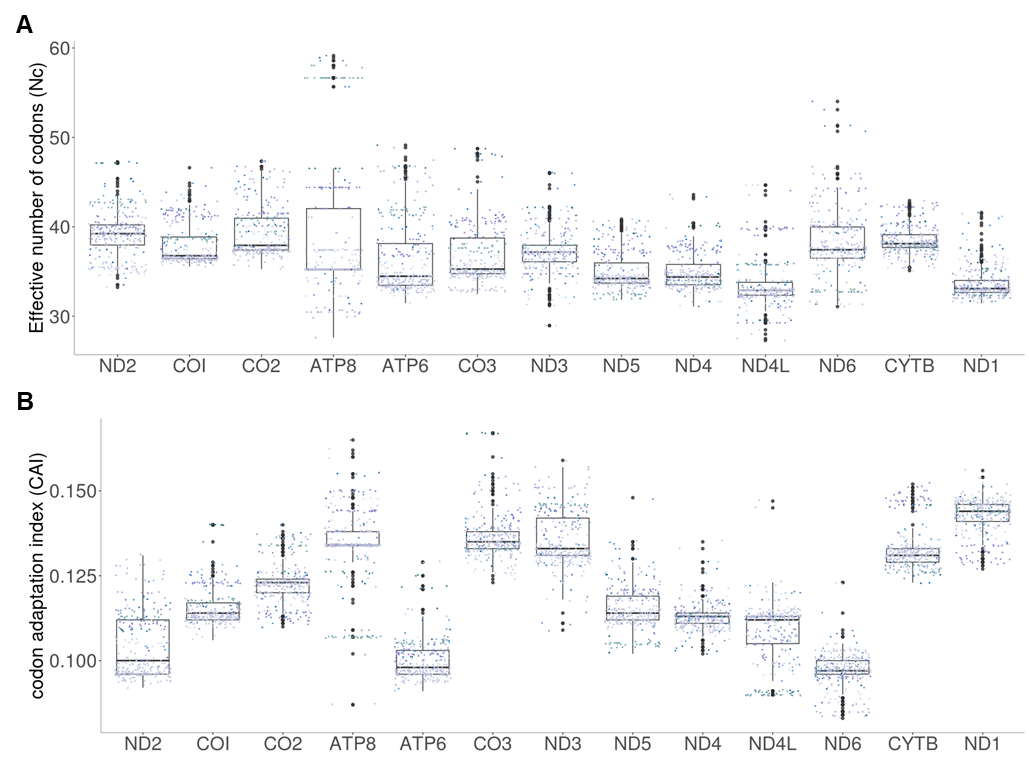


**Supplementary figure S3** Synonymous and nonsynonymous substitution rates across the 13 mitochondrial protein-coding genes (PCGs) in *Bactrocera* fruit flies. Boxplots show (**A**) nonsynonymous substitution rate (Ka) and (**B**) synonymous substitution rate (Ks) for each gene. Each data point represents individual *Bactrocera* specimens, with point colours indicating different *Bactrocera* clades.

## Codon usage


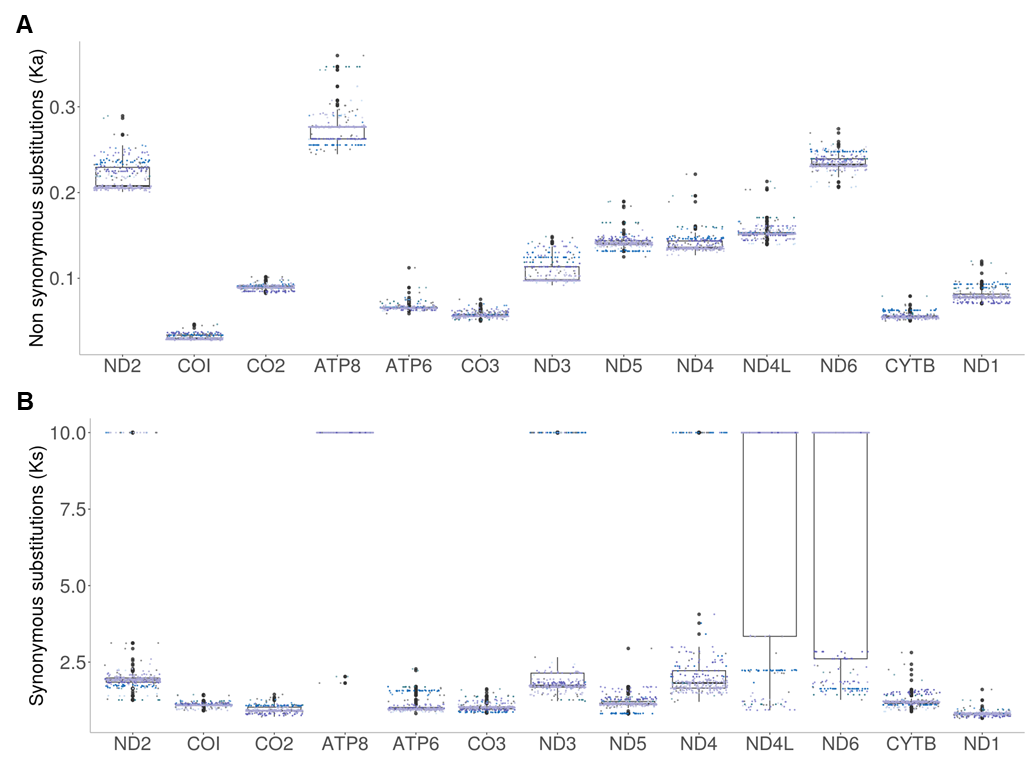


**Supplementary figure S4** Codon usage across the 13 mitochondrial protein-coding genes (PCGs) in *Bactrocera* fruit flies. Boxplots show (**A**) effective number of codons (Nc) and (**B**) codon adaptation index (CAI) for each gene. Each data point represents individual *Bactrocera* specimens, with point colours indicating different *Bactrocera* clades.

## Selectivity result from other primers/probestested


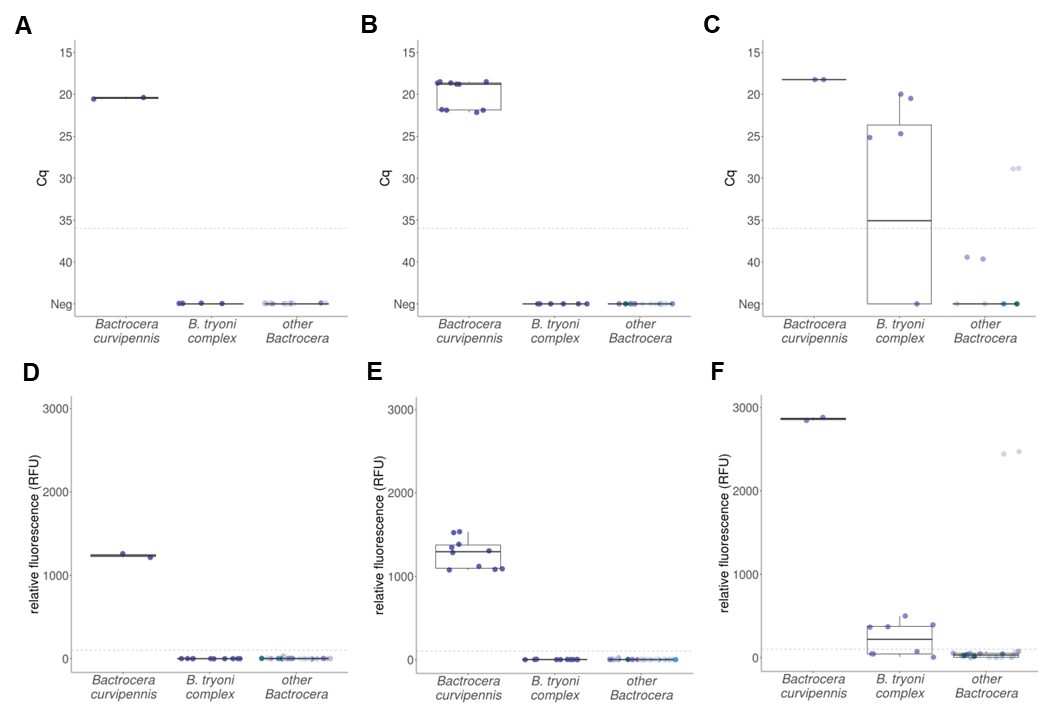


**Supplementary figure S5** **Specificity assessment of real-time PCR assays for** Bactrocera curvipennis **detection.** (**A–C**) Boxplot of Cq values for specific and non-specific amplifications across different samples, cut-off set at 36 cycles (grey dotted line). (**D–F**) Boxplot of relative fluorescence unit (RFU) for specific and non-specific amplifications, fluorescence threshold set at 100 RFU (grey dotted line). Primer-probe combinations are as follows: (**A, D**) ND2_1133F_BC and ND2_1251R_BC, with probe ND2_1192P_BC+. (**B, E**) ND2_1138F_BC and ND2_1323R_BC, with probe ND2_1192P_BC. (**C, F**) CO3_5145F_BC and CO3_5310R_BC, with probe COX3_5239P_BC. Each data point represents samples from different *Bactrocera* clades.

## *In silico* specificity


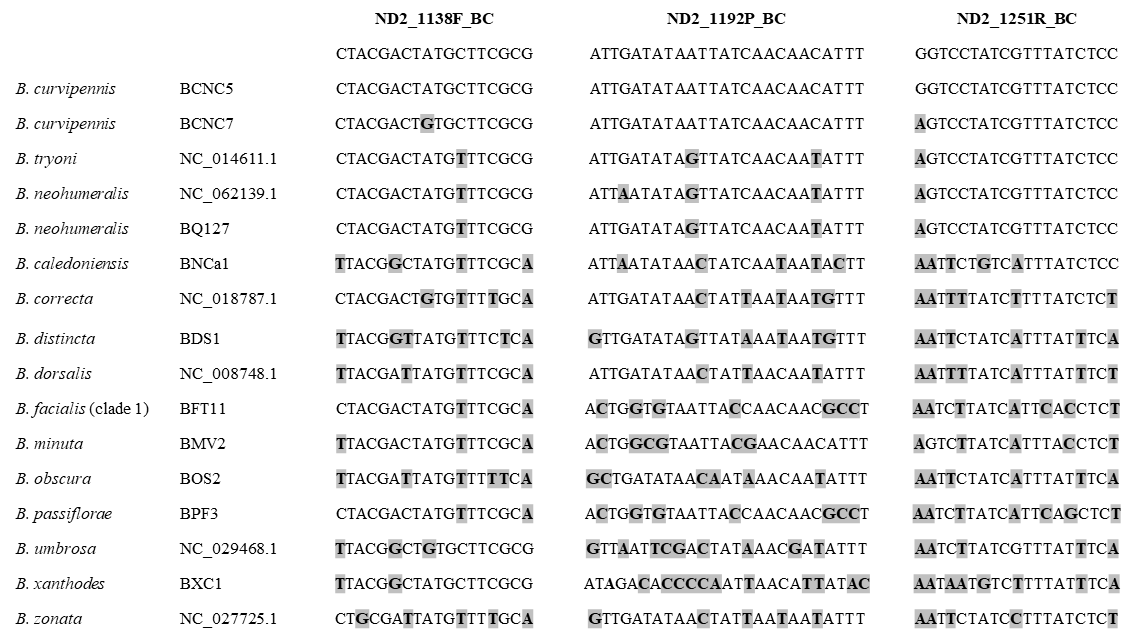


**Supplementary figure S6** Alignment of the amplified regions of the ND2sequences of *Bactrocera curvipennis*, its closely related species and commonly intercepted *Bactrocera* fruit flies. The bold highlighted letters indicate the SNPs in the species to the selected primers/probe. The reverse compliment (RC) of the primer ND2_1251R_BC was shown.

## Effect of mismatches


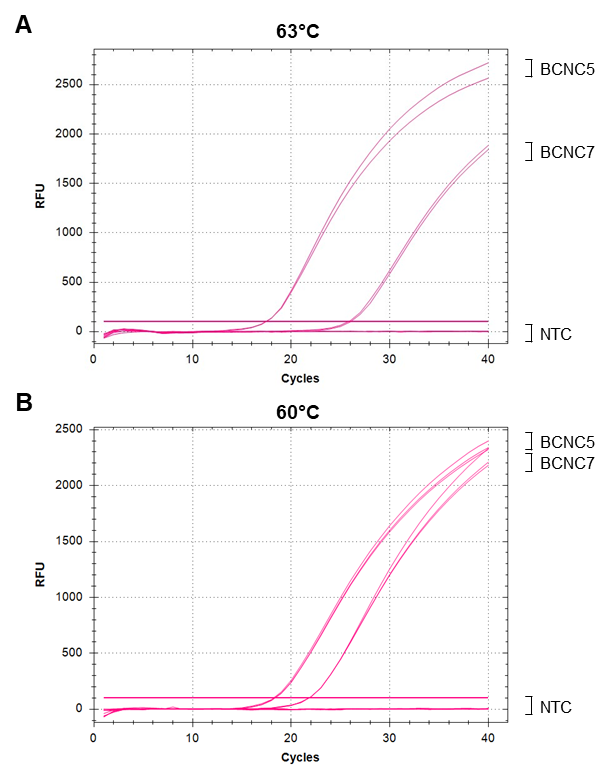


**Supplementary figure S7** Amplification curves of *Bactrocera curvipennis* ND2 real-time PCR assay showing the effects of mismatches present in the different haplotypes of the target species on the cycle quantification (Cq) and fluorescence intensity (RFU) at 63°C (**A**) or 60°C (**B**) annealing and extension. Performed with 300 nM primers and probes with no added BSA.

## All-in-one control


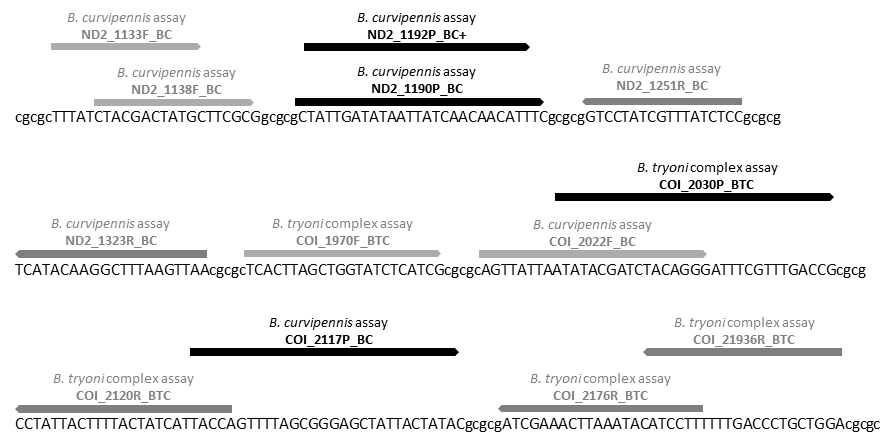


**Supplementary figure S8** Primers and probe concatenated sequence for the *Bactrocera curvipennis* and *B. tryoni* complex real-time PCR assay within the synthetic template Bac_TC_allin_control. Nucleotides in lowercase indicate connecting strings of Cs and Gs.

## Sensitivity of the ND2 real-time PCR assay in Singleplex and duplex formats


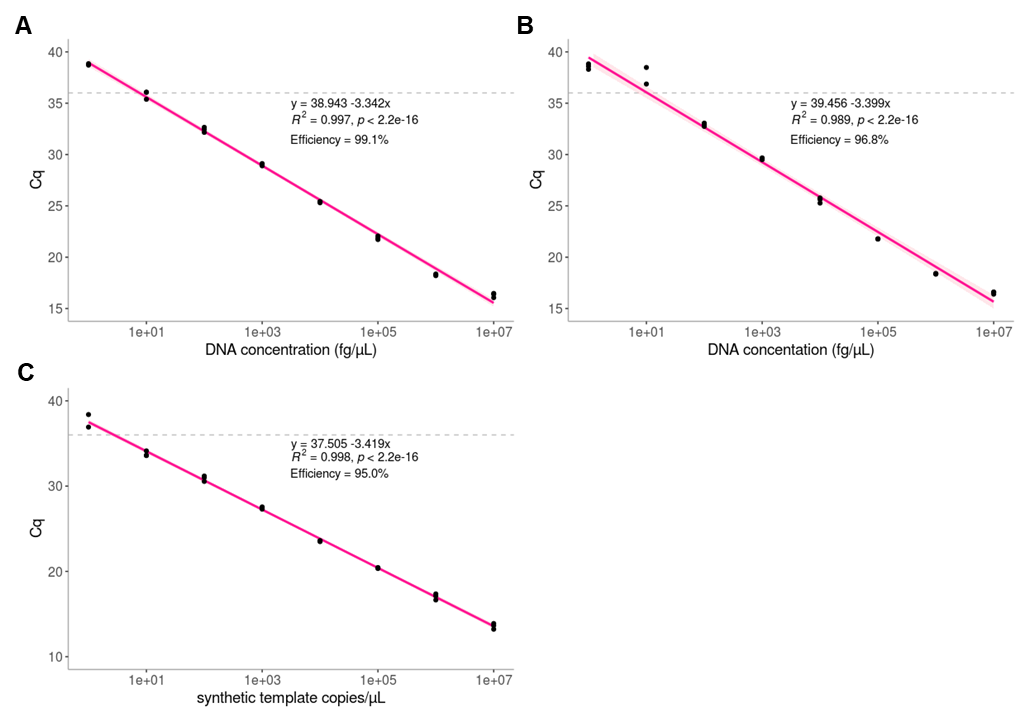


**Supplementary figure S 9** Sensitivity of the ND2 real-time PCR assay for *Bactrocera curvipennis* detection. The assay was evaluated in a singleplex format with genomic DNA from specimens BCNC5 (**A**) and BCNC7 (**B**), and in a duplex format with the synthetic template Bac_TC_allin_control with 18S internal control (**C**). Linear regression was performed on the Cq values across serial dilutions of genomic or synthetic DNA, generating a standard curve of Cq values plotted against the log concentration of genomic DNA (range = 10 ng/µL to 1 fg/µL) or log copy number of the Bac_TC_allin_control (range = 10⁷–1 copies). Shaded pink areas indicate 95% confidence intervals.
